# Supplementary material for: Clinical Interventions and All-Cause Mortality of Patients with Chronic Kidney Disease: An Umbrella Systematic Review of Meta-Analyses
Source: PubMed Central journal article supplement (PMC7074128; doi:10.3390/jcm9020394), 2020-02-01
Supplement: jcm-09-00394-s001.pdf [file jcm-09-00394-s001.pdf]

## **Supplementary material**

**Clinical interventions and all-cause mortality of patients with chronic  
kidney disease: an umbrella systematic review of meta-analyses**

## Contents

PubMed and MEDLINE search strategy

Details of data analytic methods

Table S1. PRISMA Checklist

Table S2. Details of meta-analyses of observational studies associating clinical intervention and all-cause mortality of patients with chronic kidney disease graded as suggestive evidence, weak evidence, or not significant

Table S3. Details of meta-analyses of randomized controlled trials associating clinical intervention and all-cause mortality of patients with chronic kidney disease, having  $p$ -value  $> 0.05$

Table S4. Details of credibility assessment in meta-analyses of observational studies associating clinical intervention and all-cause mortality of patients with chronic kidney disease

Table S5. Details of credibility assessment in meta-analyses of randomized controlled trials associating clinical intervention and all-cause mortality of patients with chronic kidney disease

Table S6. Details of eligible meta-analysis unique in design but ineligible for re-analysis

Table S7. Comparisons of effect of treatment on all-cause mortality between evidences from different chronic kidney disease stages

Table S8. Sensitivity subset analysis of prospective studies only of evidence from observational studies graded as convincing or highly suggestive evidence

Reference of eligible articles

## PubMed and MEDLINE search strategy

Last search performed in: 02/19/2019

- #1 "chronic kidney disease"[All Fields]
- #2 "Chronic Kidney Disease-Mineral and Bone Disorder"[Mesh]
- #3 "chronic kidney failure"[All Fields]
- #4 "chronic renal disease"[All Fields]
- #5 "chronic renal failure"[All Fields]
- #6 "chronic renal insufficiency"[All Fields]
- #7 "chronic"[All Fields] AND "kidney"[All Fields] AND "disease"[All Fields]
- #8 "chronic"[All Fields] AND "renal"[All Fields] AND "disease"[All Fields]
- #9 "chronic"[All Fields] AND "renal"[All Fields] AND "failure"[All Fields]
- #10 "dialysis"[All Fields]
- #11 "dialysis"[MeSH]
- #12 "end stage renal disease"[All Fields]
- #13 "end"[All Fields] AND "stage"[All Fields] AND "renal"[All Fields] AND "disease"[All Fields]
- #14 "esrd"[All Fields]
- #15 "haemodialysis"[All Fields]
- #16 "hemodialysis"[All Fields]
- #17 "kidney failure, chronic"[MeSH]
- #18 "kidney"[All Fields] AND "failure"[All Fields] AND "chronic"[All Fields]
- #19 "renal dialysis"[Mesh]
- #20 "Renal Insufficiency, Chronic"[Mesh]
- #21 "renal"[All Fields] AND "insufficiency"[All Fields] AND "chronic"[All Fields]
- #22 CKD [All Fields]
- #23 CRF [All Fields]
- #24 #1 OR #2 OR #3 OR #4 OR #5 OR #6 OR #7 OR #8 OR #9 OR #10 OR #11 OR #12 OR #13 OR #14 OR #15 OR #16 OR #17 OR #18 OR #19 OR #20 OR #21 OR #22 OR #23
- #25 "mortality"[All Fields]
- #26 "mortality"[MeSH]
- #27 "mortality"[Subheading]
- #28 "death"[All Fields]
- #29 "death"[MeSH]
- #30 "survival"[All Fields]
- #31 "survival"[MeSH]
- #32 "survival rate"[Mesh]
- #33 #25 OR #26 OR #27 OR #28 OR #29 OR #30 OR #31 OR #32
- #34 "meta"[All Fields]
- #35 "Meta-Analysis"[Publication Type]
- #36 #34 OR #35
- #38 #24 AND #33 AND #36

## Details of data analytic methods

### Assessment of heterogeneity

We performed Cochran's Q test and calculated the I<sup>2</sup> statistic for evaluation of heterogeneity 1,2. I<sup>2</sup> ranges from 0% to 100% and describes the percentage of variability in a study estimate that is due to between-study heterogeneity. I<sup>2</sup> > 50% was regarded as large heterogeneity. Significant heterogeneity indicates presence of genuine heterogeneity or bias.

### Estimation of the prediction interval

We estimated the 95% prediction interval, which is the range where a true effect of the intervention is to be expected for 95% of similar studies in the future 3. While the summary effects of random-effects meta-analysis represent the average effect of included studies, prediction interval estimates the treatment effect of individual studies in future settings 4. For example, a 95% prediction interval of risk ratio = (2 to 4) implies that 95% of future studies are expected to show a risk ratio between 2 and 4. Prediction intervals centers around random effects summary estimate, similar to confidence intervals. 95% prediction intervals corresponds to 95% confidence intervals when there is no in-between study heterogeneity and gets wider as in-between study heterogeneity increases. Prediction intervals including the null value suggests there may be settings where the intervention effect is null or even in the opposite direction and requires further study for identification of the causes of heterogeneity. 95% prediction interval excluding the null suggests that the treatment effect is beneficial in at least 95% of the future studies and concludes that results of treatment effects are consistent, even when some between-study heterogeneity is present.

### Assessment of small study effects

We assessed small study effects, i.e. large studies having more conservative results than smaller studies, with the regression asymmetry test proposed by Egger, et al 5. Small-study effects were claimed at Egger p value < 0.1 with the effect of the largest study (the study with the smallest standard error) showing more conservative result than the summary effect of the meta-analysis under random model. Presence of small study indicates publication bias, selective reporting, or genuine heterogeneity 6.

### Assessment of excess significance bias

We performed a test for excess significance to evaluate whether the number of studies reporting nominally significant results (p value < 0.05) is greater compared to the expected number of statistically significant studies 7. We assumed that the effect size of the largest study in a meta-analysis was plausible effect size of the individual studies 8. The expected probability that an individual study is statistically significant was assumed to be the power of the largest study at type I error rate = 0.05. Statistic A was calculated by the following  $\chi^2$  statistic:  $A = \{(O - E)^2/E + (O - E)/(N - E)\} \sim \chi^2$ , where O is the number of observed statistically significant studies, E is the expected number of statistically significant studies, and N is the total number of individual studies. Excess significance was claimed at p value < 0.1 with the number of observed significant studies larger than the number of expected significant studies. Presence of excess significance indicates publication bias, selective analysis, or outcome reporting bias.

### Application of credibility ceilings

We applied credibility ceilings to observational studies to account for their inherent methodological limitations that might result in spurious significant results of meta-analyses 9,10. We assumed that every observational study could not give more than a maximum certainty of  $100 - c\%$  ( $c$ , credibility ceiling) that the effect estimate is in the direction suggested by the point estimate and not in the other. For every observational study showing the certainty higher than the allowed threshold under the given credibility ceiling, we inflated its effect variance which resulted in lower certainty which fit the threshold. We obtained random effects summary estimates and heterogeneity of meta-analyses of observational studies under 5%, 10%, 15%, and 20% credibility ceilings, and assessed whether statistical significance under random effects ( $p < 0.05$ ) were retained.

## References

1. Cochran WG. The combination of estimates from different experiments. *Biometrics*. 1954;10:101-29.
2. Ioannidis JP, Patsopoulos NA, Evangelou E. Uncertainty in heterogeneity estimates in meta-analyses. *BMJ*. 2007;335(7626):914-6.
3. Higgins JP, Thompson SG, Spiegelhalter DJ. A re-evaluation of random-effects meta-analysis. *J R Stat Soc Ser A Stat Soc*. 2009;172(1):137-59.
4. Riley RD, Higgins JP, Deeks JJ. Interpretation of random effects meta-analyses. *BMJ*. 2011;342:d549.
5. Egger M, Davey Smith G, Schneider M, Minder C. Bias in meta-analysis detected by a simple, graphical test. *BMJ*. 1997;315(7109):629-34.
6. Sterne JA, Sutton AJ, Ioannidis JP, et al. Recommendations for examining and interpreting funnel plot asymmetry in meta-analyses of randomised controlled trials. *BMJ*. 2011;343:d4002.
7. Ioannidis JP, Trikalinos TA. An exploratory test for an excess of significant findings. *Clin Trials*. 2007;4(3):245-53.
8. Ioannidis JPA. Clarifications on the application and interpretation of the test for excess significance and its extensions. *J Math Psychol*. 2013;57(5):184-7.
9. Salanti G, Ioannidis JP. Synthesis of observational studies should consider credibility ceilings. *J Clin Epidemiol*. 2009;62(2):115-22.
10. Papatheodorou SI, Tsilidis KK, Evangelou E, Ioannidis JP. Application of credibility ceilings probes the robustness of meta-analyses of biomarkers and cancer risk. *J Clin Epidemiol*. 2015;68(2):163-74.

Table S1. PRISMA Checklist

| Section/topic                      | #  | Checklist item                                                                                                                                                                                                                                                                                              | Reported on page #          |
|------------------------------------|----|-------------------------------------------------------------------------------------------------------------------------------------------------------------------------------------------------------------------------------------------------------------------------------------------------------------|-----------------------------|
| <b>TITLE</b>                       |    |                                                                                                                                                                                                                                                                                                             |                             |
| Title                              | 1  | Identify the report as a systematic review, meta-analysis, or both.                                                                                                                                                                                                                                         | 1                           |
| <b>ABSTRACT</b>                    |    |                                                                                                                                                                                                                                                                                                             |                             |
| Structured summary                 | 2  | Provide a structured summary including, as applicable: background; objectives; data sources; study eligibility criteria, participants, and interventions; study appraisal and synthesis methods; results; limitations; conclusions and implications of key findings; systematic review registration number. | 1                           |
| <b>INTRODUCTION</b>                |    |                                                                                                                                                                                                                                                                                                             |                             |
| Rationale                          | 3  | Describe the rationale for the review in the context of what is already known.                                                                                                                                                                                                                              | 2                           |
| Objectives                         | 4  | Provide an explicit statement of questions being addressed with reference to participants, interventions, comparisons, outcomes, and study design (PICOS).                                                                                                                                                  | 2                           |
| <b>METHODS</b>                     |    |                                                                                                                                                                                                                                                                                                             |                             |
| Protocol and registration          | 5  | Indicate if a review protocol exists, if and where it can be accessed (e.g., Web address), and, if available, provide registration information including registration number.                                                                                                                               | 2                           |
| Eligibility criteria               | 6  | Specify study characteristics (e.g., PICOS, length of follow-up) and report characteristics (e.g., years considered, language, publication status) used as criteria for eligibility, giving rationale.                                                                                                      | 2-3                         |
| Information sources                | 7  | Describe all information sources (e.g., databases with dates of coverage, contact with study authors to identify additional studies) in the search and date last searched.                                                                                                                                  | 2-3                         |
| Search                             | 8  | Present full electronic search strategy for at least one database, including any limits used, such that it could be repeated.                                                                                                                                                                               | 2-3, supplementary material |
| Study selection                    | 9  | State the process for selecting studies (i.e., screening, eligibility, included in systematic review, and, if applicable, included in the meta-analysis).                                                                                                                                                   | 2-3                         |
| Data collection process            | 10 | Describe method of data extraction from reports (e.g., piloted forms, independently, in duplicate) and any processes for obtaining and confirming data from investigators.                                                                                                                                  | 3                           |
| Data items                         | 11 | List and define all variables for which data were sought (e.g., PICOS, funding sources) and any assumptions and simplifications made.                                                                                                                                                                       | 3                           |
| Risk of bias in individual studies | 12 | Describe methods used for assessing risk of bias of individual studies (including specification of whether this was done at the study or outcome level), and how this information is to be used in any data synthesis.                                                                                      | 3-4                         |
| Summary measures                   | 13 | State the principal summary measures (e.g., risk ratio, difference in means).                                                                                                                                                                                                                               | 3-4                         |
| Synthesis of results               | 14 | Describe the methods of handling data and combining results of studies, if done, including measures of consistency (e.g., $I^2$ ) for each meta-analysis.                                                                                                                                                   | 3-4, supplementary material |

| Section/topic                 | #  | Checklist item                                                                                                                                                                                           | Reported on page #                      |
|-------------------------------|----|----------------------------------------------------------------------------------------------------------------------------------------------------------------------------------------------------------|-----------------------------------------|
| Risk of bias across studies   | 15 | Specify any assessment of risk of bias that may affect the cumulative evidence (e.g., publication bias, selective reporting within studies).                                                             | 3-4                                     |
| Additional analyses           | 16 | Describe methods of additional analyses (e.g., sensitivity or subgroup analyses, meta-regression), if done, indicating which were pre-specified.                                                         | 3-4                                     |
| <b>RESULTS</b>                |    |                                                                                                                                                                                                          |                                         |
| Study selection               | 17 | Give numbers of studies screened, assessed for eligibility, and included in the review, with reasons for exclusions at each stage, ideally with a flow diagram.                                          | 4,7,8, Figure 1, Supplementary material |
| Study characteristics         | 18 | For each study, present characteristics for which data were extracted (e.g., study size, PICOS, follow-up period) and provide the citations.                                                             | 4,7-12                                  |
| Risk of bias within studies   | 19 | Present data on risk of bias of each study and, if available, any outcome level assessment (see item 12).                                                                                                | 7-8, Table 2, Table S2-S6               |
| Results of individual studies | 20 | For all outcomes considered (benefits or harms), present, for each study: (a) simple summary data for each intervention group (b) effect estimates and confidence intervals, ideally with a forest plot. | 7-8, Table 2, Table S2-S6               |
| Synthesis of results          | 21 | Present results of each meta-analysis done, including confidence intervals and measures of consistency.                                                                                                  | 7-8, Table 2, Table S2-S5               |
| Risk of bias across studies   | 22 | Present results of any assessment of risk of bias across studies (see Item 15).                                                                                                                          | 7-8, Table 2, Table S2-S5               |
| Additional analysis           | 23 | Give results of additional analyses, if done (e.g., sensitivity or subgroup analyses, meta-regression [see Item 16]).                                                                                    | N/A                                     |
| <b>DISCUSSION</b>             |    |                                                                                                                                                                                                          |                                         |
| Summary of evidence           | 24 | Summarize the main findings including the strength of evidence for each main outcome; consider their relevance to key groups (e.g., healthcare providers, users, and policy makers).                     | 15-16                                   |
| Limitations                   | 25 | Discuss limitations at study and outcome level (e.g., risk of bias), and at review-level (e.g., incomplete retrieval of identified research, reporting bias).                                            | 16-17                                   |
| Conclusions                   | 26 | Provide a general interpretation of the results in the context of other evidence, and implications for future research.                                                                                  | 17                                      |
| <b>FUNDING</b>                |    |                                                                                                                                                                                                          |                                         |
| Funding                       | 27 | Describe sources of funding for the systematic review and other support (e.g., supply of data); role of funders for the systematic review.                                                               | 17                                      |

**Table S2. Details of meta-analyses of observational studies associating clinical intervention and all-cause mortality of patients with chronic kidney disease graded as suggestive evidence, weak evidence, or not significant**

| Author, year                                      | Comparison (experimental arm vs. control arm)                                           | CKD stages       | Follow-up duration (months)* or time of outcome measurement | Number of studies | Deaths / population | Effect metrics | Summary effect estimate (95% CI) under random effects† | Summary estimate p value | I2 ( % ) | 95% prediction interval | Evaluation of bias ‡                                                                              |
|---------------------------------------------------|-----------------------------------------------------------------------------------------|------------------|-------------------------------------------------------------|-------------------|---------------------|----------------|--------------------------------------------------------|--------------------------|----------|-------------------------|---------------------------------------------------------------------------------------------------|
| <b>Observational studies, suggestive evidence</b> |                                                                                         |                  |                                                             |                   |                     |                |                                                        |                          |          |                         |                                                                                                   |
| Volodarskiy, et al. 2016                          | PCI vs. medical therapy for coronary revascularization therapy                          | 3-5              | 48                                                          | 15                | 3801 / 12647        | RR             | 0.72 (0.6 to 0.86)                                     | 0.00039                  | 82       | 0.37 to 1.39            | Large heterogeneity; excess significance bias; loss of significance under 10% credibility ceiling |
| Khera, et al. 2018                                | DES vs. BMS for coronary revascularization therapy                                      | 5D               | 12                                                          | 16                | 24838 / 62863       | OR             | 0.75 (0.64 to 0.89)                                    | 0.00079                  | 86       | 0.45 to 1.26            | Large heterogeneity; loss of significance under 10% credibility ceiling                           |
| Lu, et al. 2016                                   | DES vs. BMS for coronary revascularization therapy                                      | Any              | 6 - 72                                                      | 26                | >1000 / 117247      | OR             | 0.79 (0.71 to 0.89)                                    | 0.00042                  | 81       | 0.55 to 1.15            | Large heterogeneity; loss of significance under 10% credibility ceiling                           |
| Fu, et al. 2017                                   | ICD for primary prevention of sudden cardiac death vs. no ICD                           | 3-5              | 12 - 96                                                     | 11                | >1000 / 19808       | HR             | 0.74 (0.63 to 0.86)                                    | 0.00013                  | 77       | 0.46 to 1.18            | Large heterogeneity                                                                               |
| Apetrii, et al. 2017                              | Parathyroidectomy for secondary hyperparathyroidism vs. non-surgical treatment          | 5D               | 12 - 360                                                    | 14                | >1000 / 24003       | HR             | 0.74 (0.66 to 0.83)                                    | 0.000003                 | 81       | 0.54 to 1.02            | Large heterogeneity; small study effects                                                          |
| Ravani, et al. 2013                               | Graft as HD access vs. fistula                                                          | 5HD              | 18                                                          | 17                | >1000 / 398233      | RR             | 1.18 (1.09 to 1.27)                                    | 0.00022                  | 81       | 0.92 to 1.51            | Large heterogeneity                                                                               |
| Mathew, et al. 2018                               | Intensive HD vs. PD                                                                     | 5                | 36 - 144                                                    | 3                 | >1000 / 17121       | HR             | 0.67 (0.53 to 0.84)                                    | 0.00064                  | 91       | 0.04 to 11.75           | Large heterogeneity; small study effects                                                          |
| Kelly, et al. 2017                                | Healthy dietary pattern low on red meat, sodium, and refined sugar vs. control          | 3-5              | 48 - 156                                                    | 6                 | 3983 / 11944        | RR             | 0.75 (0.66 to 0.87)                                    | 0.00069                  | 0        | 0.62 to 0.92            | None                                                                                              |
| <b>Observational studies, weak evidence</b>       |                                                                                         |                  |                                                             |                   |                     |                |                                                        |                          |          |                         |                                                                                                   |
| Wang, et al. 2018                                 | Off-pump CABG vs. on-pump CABG                                                          | 3-5              | Short-term mortality (in-hospital or at 30 days)            | 13                | 6110 / 196522       | OR             | 0.82 (0.7 to 0.96)                                     | 0.016                    | 23       | 0.61 to 1.1             | Small study effects                                                                               |
| Volodarskiy, et al. 2016                          | PCI vs. medical therapy for coronary revascularization therapy                          | 5D               | Short-term mortality (in-hospital or at 30 days)            | 2                 | 418 / 2854          | RR             | 0.6 (0.36 to 0.99)                                     | 0.046                    | 44       | NA                      | Loss of significance under 10% credibility ceiling                                                |
| Yang, et al. 2018                                 | Limus-eluting stent vs. paclitaxel-eluting stent for coronary revascularization therapy | 3-5              | 12 - 26                                                     | 15                | 732 / 6392          | OR             | 0.78 (0.65 to 0.94)                                    | 0.0089                   | 9        | 0.57 to 1.07            | Loss of significance under 10% credibility ceiling                                                |
| Wang, et al. 2018                                 | DES vs. BMS for coronary revascularization therapy                                      | 5D               | 6 - 84                                                      | 18                | 18763 / 44194       | OR             | 0.78 (0.66 to 0.93)                                    | 0.0043                   | 76       | 0.49 to 1.25            | Large heterogeneity; loss of significance under 10% credibility ceiling                           |
| Li, et al. 2018                                   | Combined RAAS blockade vs. ACEI or ARB                                                  | 5                | 6 - 18                                                      | 6                 | 1226 / 12873        | OR             | 0.71 (0.54 to 0.93)                                    | 0.012                    | 50       | 0.36 to 1.39            | Large heterogeneity                                                                               |
| Crowley, et al. 2017                              | Metformin regimen for diabetes vs. control                                              | 3-5              | 12 - 47                                                     | 7                 | NR / 33442          | HR             | 0.78 (0.66 to 0.92)                                    | 0.0039                   | 80       | 0.46 to 1.33            | Large heterogeneity; loss of significance under 10% credibility ceiling                           |
| Yang, et al. 2015                                 | Statin vs. control                                                                      | 5D with diabetes | 24 - 52                                                     | 5                 | NR / 13081          | HR             | 0.81 (0.71 to 0.92)                                    | 0.0017                   | 55       | 0.55 to 1.2             | Large heterogeneity                                                                               |
| Lu, et al. 2017                                   | Vitamin D or analogues vs. non-vitamin D treatment                                      | ND               | 23 - 53                                                     | 4                 | NR / 2729           | RR             | 0.53 (0.32 to 0.87)                                    | 0.013                    | 76       | 0.06 to 4.48            | Large heterogeneity; loss of significance under 10% credibility ceiling                           |
| Wongrakpanich, et al. 2017                        | Dialysis therapy vs. conservative management                                            | 5                | 12 - 216                                                    | 3                 | 357 / 1438          | HR             | 0.53 (0.3 to 0.92)                                     | 0.023                    | 73       | 0 to 281.03             | Large heterogeneity; loss of significance under 10% credibility ceiling                           |
| Han, et al. 2015                                  | HD vs. PD                                                                               | 5                | 12 - 120                                                    | 15                | NR / 631421         | HR             | 0.89 (0.82 to 0.97)                                    | 0.0099                   | 83       | 0.66 to 1.22            | Large heterogeneity; loss of significance under 10% credibility ceiling                           |
| Shi, et al. 2018                                  | Multidisciplinary care vs. no multidisciplinary care                                    | Any              | 36                                                          | 12                | 762 / 7390          | OR             | 0.61 (0.43 to 0.86)                                    | 0.0052                   | 70       | 0.2 to 1.91             | Large heterogeneity; loss of significance under 10% credibility ceiling                           |
| <b>Observational studies, no association</b>      |                                                                                         |                  |                                                             |                   |                     |                |                                                        |                          |          |                         |                                                                                                   |
| Volodarskiy, et al. 2016                          | CABG vs. medical therapy                                                                | 3-5              | 48                                                          | 5                 | 2335 / 6113         | RR             | 0.76 (0.5 to 1.15)                                     | 0.19                     | 93       | 0.16 to 3.6             | Large heterogeneity                                                                               |
| Volodarskiy, et al. 2016                          | CABG vs. medical therapy                                                                | 5D               | 48                                                          | 3                 | 894 / 3160          | RR             | 0.88 (0.62 to 1.26)                                    | 0.49                     | 67       | 0.02 to 45.72           | Large heterogeneity                                                                               |
| Volodarskiy, et al. 2016                          | CABG vs. medical therapy                                                                | 3-5              | Short-term mortality (in-hospital or at 30 days)            | 3                 | 459 / 3642          | RR             | 1.06 (0.79 to 1.43)                                    | 0.7                      | 0        | 0.15 to 7.45            | None                                                                                              |



|                          |                                                                                                                |              |                                                  |    |               |    |                     |       |        |               |                                                                    |
|--------------------------|----------------------------------------------------------------------------------------------------------------|--------------|--------------------------------------------------|----|---------------|----|---------------------|-------|--------|---------------|--------------------------------------------------------------------|
| Volodarskiy, et al. 2016 | CABG vs. medical therapy                                                                                       | 5D           | Short-term mortality (in-hospital or at 30 days) | 2  | 416 / 2645    | RR | 1.17 (0.82 to 1.65) | 0.39  | 0      | NA            | None                                                               |
| Ren, et al. 2014         | CABG vs. PCI                                                                                                   | 5D           | 12 - 60                                          | 22 | 48664 / 77133 | OR | 0.92 (0.8 to 1.06)  | 0.25  | 8<br>2 | 0.61 to 1.38  | Large heterogeneity                                                |
| Volodarskiy, et al. 2016 | PCI vs. medical therapy for coronary revascularization therapy                                                 | 5D           | 48                                               | 5  | 1120 / 3888   | RR | 0.72 (0.52 to 1)    | 0.051 | 8<br>5 | 0.22 to 2.4   | Large heterogeneity; small study effects; excess significance bias |
| Lu, et al. 2016          | Spirolactone vs. no mineralocorticoid receptors                                                                | Any          | 12 - 21                                          | 3  | NR / 2863     | RR | 0.9 (0.71 to 1.15)  | 0.4   | 5<br>9 | 0.07 to 11.95 | Large heterogeneity                                                |
| Phan, et al. 2016        | Bioprosthetic vs. mechanical valve placement                                                                   | 5D           | 19 - 120                                         | 14 | NR / 6820     | HR | 1.2 (0.99 to 1.46)  | 0.068 | 5<br>0 | 0.7 to 2.07   | Large heterogeneity                                                |
| Cheng, et al. 2018       | Trans-catheter vs. surgical aortic valve replacement                                                           | 5D           | Short-term mortality (in-hospital or at 30 days) | 5  | 642 / 8064    | OR | 0.78 (0.51 to 1.21) | 0.27  | 3<br>0 | 0.26 to 2.37  | None                                                               |
| Cheng, et al. 2018       | Trans-catheter vs. surgical aortic valve replacement                                                           | ND           | Short-term mortality (in-hospital or at 30 days) | 5  | 792 / 9619    | OR | 0.65 (0.41 to 1.03) | 0.065 | 6<br>7 | 0.16 to 2.68  | Large heterogeneity                                                |
| Lei, et al. 2018         | Warfarin for atrial fibrillation vs. control                                                                   | 5HD          | 13 - 120                                         | 12 | 9088 / 19281  | OR | 0.91 (0.8 to 1.03)  | 0.14  | 4<br>2 | 0.67 to 1.24  | None                                                               |
| Apetrii, et al. 2017     | Parathyroidectomy for secondary hyperparathyroidism vs. non-surgical treatment                                 | 5D           | 1                                                | 2  | NR / NR       | HR | 1.43 (0.45 to 4.55) | 0.54  | 9<br>7 | NA            | Large heterogeneity                                                |
| Li, et al. 2017          | Total parathyroidectomy for secondary hyperparathyroidism vs. total parathyroidectomy with autotransplantation | Any          | 12 - 36                                          | 4  | 28 / 220      | RR | 0.82 (0.36 to 1.86) | 0.63  | 1<br>1 | 0.09 to 7.21  | None                                                               |
| Scotland, et al. 2018    | Multiple-frequency bioimpedance devices for HD fluid management vs. standard clinical assessment               | Any          | 12                                               | 3  | 42 / 618      | HR | 0.69 (0.23 to 2.08) | 0.51  | 5<br>4 | 0 to 71653.7  | Large heterogeneity                                                |
| Zhao, et al. 2018        | Earlier PD vs. later PD                                                                                        | 5            | 12 - 180                                         | 10 | NR / NR       | HR | 1.04 (0.99 to 1.08) | 0.1   | 4<br>9 | 0.94 to 1.14  | None                                                               |
| Zhou, et al. 2018        | HD vs. PD                                                                                                      | Any with PKD | 60 - 264                                         | 7  | NR / 7665     | RR | 1.06 (0.84 to 1.34) | 0.63  | 3<br>5 | 0.61 to 1.83  | None                                                               |

\* Represented as median or range of follow-up duration of individual studies.

† Summary estimate smaller than 1 favors experimental arm (lower mortality in experimental arm); effect estimate larger than 1 favors control arm (lower mortality in control arm)

‡ Any of the following: large heterogeneity, signs of small study effects, signs of excess significance bias, or loss of statistical significance in 10% credibility ceiling.

All statistical tests are two-sided.

Abbreviations: ACEI, angiotensin-converting enzyme inhibitor; ARB, angiotensin receptor blocker; BMS, bare metal stent; CABG, coronary artery bypass; CI, confidence interval; CKD, chronic kidney disease; DES, drug-eluting stent; HD, hemodialysis; HR, hazard ratio; ICD, implantable cardioverter defibrillator; NA, not available; NR, not reported; OR, odds ratio; PCI, percutaneous intervention; PD, peritoneal dialysis; PKD, polycystic kidney disease; RAAS, renin-angiotensin-aldosterone system; RR, risk ratio; vs., versus

**Table S3. Details of meta-analyses of randomized controlled trials associating clinical intervention and all-cause mortality of patients with chronic kidney disease, having p value > 0.05**

| Author, year             | Comparison (experimental arm vs. control arm)                                                                                               | CKD stages               | Follow-up duration (months)* or time of outcome measurement | Number of studies | Deaths / population | Effect metrics | Summary effect estimate (95% CI) under random effects† | Summary estimate p value | I2 ( % ) | 95% prediction interval | Evaluation of bias ‡ |
|--------------------------|---------------------------------------------------------------------------------------------------------------------------------------------|--------------------------|-------------------------------------------------------------|-------------------|---------------------|----------------|--------------------------------------------------------|--------------------------|----------|-------------------------|----------------------|
| Hahn, et al. 2017        | Epoetin $\alpha$ for anemia treatment every 2 weeks vs. weekly                                                                              | 5D                       | 1 - 14                                                      | 4                 | 22 / 838            | RR             | 0.89 (0.38 to 2.09)                                    | 0.79                     | 0        | 0.14 to 5.78            | None                 |
| Palmer, et al. 2014      | Epoetin $\beta$ for anemia treatment vs. control therapy                                                                                    | Any                      | 6                                                           | 3                 | 41 / 468            | OR             | 0.7 (0.36 to 1.33)                                     | 0.27                     | 0        | 0.01 to 46.51           | None                 |
| Amato, et al. 2018       | Epoetin $\alpha$ for anemia treatment vs. biosimilar ESA                                                                                    | Any                      | 3 - 12                                                      | 8                 | 108 / 2294          | RR             | 0.94 (0.52 to 1.69)                                    | 0.83                     | 42       | 0.22 to 4.05            | None                 |
| Palmer, et al. 2014      | Darbepoetin $\alpha$ intravenous injection for anemia treatment vs. subcutaneous injection                                                  | 5D                       | 29                                                          | 2                 | 9 / 183             | RR             | 1.29 (0.33 to 5.12)                                    | 0.72                     | 0        | NA                      | None                 |
| Volodarskiy, et al. 2018 | 1st, 2nd generation DES vs. BMS for coronary revascularization therapy                                                                      | 3-5                      | 25                                                          | 5                 | 230 / 1567          | RR             | 0.99 (0.78 to 1.27)                                    | 0.96                     | 0        | 0.67 to 1.48            | None                 |
| Sharma, et al. 2011      | ACEI vs. placebo                                                                                                                            | 3 without diabetes       | 36 - 42                                                     | 2                 | 170 / 1906          | RR             | 1.79 (0.17 to 18.47)                                   | 0.62                     | 81       | NA                      | Large heterogeneity  |
| Nistor, et al. 2018      | ACEI or ARB single agent vs. placebo or active control                                                                                      | 3-5ND with diabetes      | 29 - 48                                                     | 4                 | 828 / 5309          | RR             | 0.97 (0.85 to 1.1)                                     | 0.6                      | 0        | 0.73 to 1.28            | None                 |
| Liu, et al. 2017         | ACEI or ARB single agent vs. placebo or active control                                                                                      | 5D                       | 46                                                          | 8                 | 265 / 1746          | RR             | 0.94 (0.75 to 1.17)                                    | 0.59                     | 0        | 0.71 to 1.24            | None                 |
| Zhao, et al. 2016        | Calcium channel blockers vs. ACEI or ARB                                                                                                    | Any                      | 35 - 60                                                     | 9                 | 3566 / 25642        | OR             | 0.96 (0.89 to 1.03)                                    | 0.21                     | 0        | 0.88 to 1.04            | None                 |
| Zeng, et al. 2018        | Bivalirudin for coronary artery disease vs. heparin plus glycoprotein IIb/IIIa inhibitors                                                   | Any                      | < 1                                                         | 5                 | 147 / 3796          | RR             | 1.12 (0.81 to 1.53)                                    | 0.5                      | 0        | 0.66 to 1.87            | None                 |
| Palmer, et al. 2013      | Antiplatelet agent for general CKD patients vs. control therapy                                                                             | 3-5                      | 1 - 60                                                      | 21                | 1145 / 16152        | RR             | 0.95 (0.84 to 1.08)                                    | 0.43                     | 10       | 0.76 to 1.19            | None                 |
| Shaw, et al. 2016        | Early invasive coronary angiography and/or revascularization for non ST elevation acute coronary syndrome vs. initial conservative approach | Any                      | Mortality assessed in-hospital or at 6 - 12 months          | 5                 | NR / 1453           | HR             | 0.76 (0.49 to 1.17)                                    | 0.21                     | 14       | 0.3 to 1.91             | None                 |
| Pun, et al. 2014         | ICD for primary prevention of sudden cardiac death vs. no ICD                                                                               | 3b                       | 20 - 40                                                     | 3                 | NR / NR             | HR             | 0.82 (0.66 to 1.01)                                    | 0.068                    | 0        | 0.2 to 3.33             | None                 |
| He, et al. 2018          | N-acetylcysteine after cardiac surgery vs. placebo                                                                                          | Any                      | NA                                                          | 5                 | 30 / 678            | RR             | 0.64 (0.29 to 1.4)                                     | 0.26                     | 0        | 0.18 to 2.29            | Small study effects  |
| Wang, et al. 2018        | Cinacalcet and/or vitamin D analogue or phosphate binders vs. placebo and/or vitamin D analogue or phosphate binders                        | 3-5                      | < 12                                                        | 16                | NR / 8386           | RR             | 0.97 (0.89 to 1.05)                                    | 0.42                     | 0        | 0.89 to 1.06            | None                 |
| Lo, et al. 2018          | DPP-4 inhibitor for diabetes vs. placebo                                                                                                    | 3-5 with diabetes        | NA                                                          | 6                 | 397 / 4211          | RR             | 0.89 (0.75 to 1.06)                                    | 0.19                     | 0        | 0.69 to 1.14            | None                 |
| Toyama, et al. 2019      | SGLT-2 inhibitor for diabetes vs. placebo                                                                                                   | 3-5 with type 2 diabetes | NA                                                          | 5                 | 593 / 7363          | RR             | 0.86 (0.73 to 1.01)                                    | 0.069                    | 0        | 0.66 to 1.12            | None                 |
| Ruospo, et al. 2018      | Iron-based phosphate binders vs. placebo or usual care                                                                                      | Any                      | 3.7                                                         | 2                 | 3 / 239             | RR             | 0.52 (0.06 to 4.61)                                    | 0.55                     | 0        | NA                      | None                 |
| Habbous, et al. 2017     | Lanthanum carbonate vs. calcium-based phosphate binders                                                                                     | 3-5                      | 0.5 - 36                                                    | 4                 | 7 / 1564            | RR             | 0.73 (0.18 to 3)                                       | 0.66                     | 0        | 0.03 to 16.25           | None                 |
| Habbous, et al. 2017     | Sevelamer vs. calcium-based phosphate binders                                                                                               | 3-5                      | 0.5 - 36                                                    | 12                | 751 / 5071          | RR             | 0.62 (0.35 to 1.07)                                    | 0.085                    | 75       | 0.13 to 3.03            | Large heterogeneity  |
| Sun, et al. 2015         | Statin vs. placebo                                                                                                                          | 5D                       | 48 - 60                                                     | 3                 | 2900 / 7051         | RR             | 0.98 (0.93 to 1.03)                                    | 0.41                     | 0        | 0.69 to 1.39            | None                 |
| Lu, et al. 2017          | Vitamin D or analogues vs. non-vitamin D treatment                                                                                          | 5D                       | 3 - 24                                                      | 9                 | NR / 700            | RR             | 1.13 (0.63 to 2.03)                                    | 0.68                     | 0        | 0.56 to 2.29            | None                 |
| Lu, et al. 2017          | Vitamin D or analogues vs. non-vitamin D treatment                                                                                          | ND                       | 3 - 24                                                      | 6                 | NR / 832            | RR             | 1.55 (0.52 to 4.62)                                    | 0.44                     | 0        | 0.33 to 7.3             | None                 |
| Wang, et al. 2014        | Hemodiafiltration vs. conventional HD                                                                                                       | 5                        | 24 - 36                                                     | 6                 | 612 / 2727          | RR             | 0.87 (0.66 to 1.16)                                    | 0.36                     | 58       | 0.41 to 1.86            | Large heterogeneity  |

|                        |                                                                                                        |       |         |    |             |    |                     |       |    |                |                     |
|------------------------|--------------------------------------------------------------------------------------------------------|-------|---------|----|-------------|----|---------------------|-------|----|----------------|---------------------|
| Nistor, et al. 2015    | Hemofiltration or hemodiafiltration or acetate-free biofiltration vs. conventional HD                  | 5     | 12 - 48 | 11 | 787 / 3396  | RR | 0.87 (0.72 to 1.04) | 0.13  | 33 | 0.58 to 1.31   | None                |
| Wang, et al. 2014      | Hemofiltration vs. conventional HD                                                                     | 5     | 12 - 36 | 3  | 24 / 125    | RR | 0.55 (0.26 to 1.16) | 0.12  | 0  | 0 to 67.71     | None                |
| Song, et al. 2010      | Renal replacement therapy for prevention of acute kidney injury vs. control                            | 3-5   | NR      | 4  | 26 / 591    | OR | 0.36 (0.12 to 1.07) | 0.067 | 24 | 0.01 to 10.41  | None                |
| Wang, et al. 2016      | Citrate for alternative HD catheter lock solution vs. heparin 5000 IU/mL                               | 5HD   | 6       | 8  | 63 / 1425   | RR | 0.88 (0.54 to 1.43) | 0.6   | 0  | 0.48 to 1.61   | None                |
| McCann, et al. 2010    | Topical antimicrobial ointment usage in central venous catheter HD patients vs. no ointment or placebo | 5HD   | 6       | 3  | 28 / 322    | RR | 0.36 (0.12 to 1.05) | 0.062 | 33 | 0 to 6751.56   | None                |
| Wang, et al. 2016      | Systematic warfarin for preventing central venous HD catheter malfunction vs. placebo                  | 5HD   | 6       | 3  | 26 / 403    | RR | 0.78 (0.37 to 1.66) | 0.52  | 0  | 0.01 to 103.84 | None                |
| Htay, et al. 2018      | Low glucose degradation product PD dialysate vs. standard glucose dialysate                            | 5PD   | 1-24    | 13 | 80 / 1229   | RR | 0.74 (0.47 to 1.14) | 0.17  | 0  | 0.45 to 1.21   | None                |
| Htay, et al. 2018      | Glucose polymer PD dialysate vs. standard glucose dialysate                                            | 5PD   | 1-24    | 5  | 16 / 816    | RR | 0.82 (0.42 to 1.59) | 0.55  | 0  | 0.28 to 2.42   | None                |
| Xie, et al. 2011       | Coiled intraperitoneal segment PD catheters vs. straight intraperitoneal segment catheters             | 5PD   | 12 - 32 | 4  | 48 / 317    | RR | 0.94 (0.56 to 1.57) | 0.81  | 0  | 0.3 to 2.9     | None                |
| Sampson, et al. 2017   | Allopurinol as uric acid lowering therapy vs. usual care                                               | Any   | 24      | 2  | 7 / 218     | RR | 0.13 (0.02 to 1.06) | 0.056 | 0  | NA             | None                |
| Jun, et al. 2012       | Antioxidants vs. control                                                                               | 3-5   | 12 - 48 | 5  | 299 / 1727  | RR | 0.93 (0.76 to 1.14) | 0.46  | 0  | 0.67 to 1.29   | None                |
| Shi, et al. 2018       | Multidisciplinary care vs. no multidisciplinary care                                                   | Any   | 36      | 4  | 240 / 1912  | OR | 0.82 (0.53 to 1.27) | 0.39  | 41 | 0.18 to 3.8    | None                |
| Valentijn, et al. 2018 | Person-centered integrated care vs. control                                                            | Any   | 12      | 11 | 270 / 4126  | RR | 0.86 (0.68 to 1.09) | 0.21  | 6  | 0.6 to 1.23    | None                |
| Silver, et al. 2017    | Quality improvement strategy vs. usual care                                                            | 3-5   | 12      | 8  | 333 / 3853  | RR | 0.94 (0.72 to 1.23) | 0.65  | 21 | 0.55 to 1.6    | None                |
| Palmer, et al. 2017    | Dietary counselling vs. control                                                                        | 3-5   | 12      | 4  | 18 / 371    | RR | 1.58 (0.6 to 4.18)  | 0.36  | 0  | 0.19 to 13.33  | None                |
| Jun, et al. 2012       | Fibrate vs. placebo                                                                                    | 3     | 61      | 2  | 128 / 918   | RR | 0.86 (0.63 to 1.19) | 0.37  | 0  | NA             | None                |
| Jun, et al. 2012       | Fibrate vs. placebo                                                                                    | 1-2   | 61      | 2  | 969 / 11408 | RR | 1.01 (0.8 to 1.27)  | 0.94  | 74 | NA             | Large heterogeneity |
| Nigwekar, et al. 2016  | Folic acid and/or vitamin B6 and/or vitamin B12 vs. control                                            | 5D    | 23 - 43 | 6  | 819 / 2447  | RR | 1 (0.9 to 1.12)     | 1     | 0  | 0.85 to 1.17   | None                |
| Jardine, et al. 2012   | Folic acid and/or vitamin B6 and/or vitamin B12 vs. control                                            | 3-5   | 32 - 60 | 4  | 756 / 2215  | RR | 1.04 (0.93 to 1.16) | 0.45  | 0  | 0.82 to 1.33   | None                |
| Hahn, et al. 2018      | Low protein diet vs. normal protein diet                                                               | 3-5ND | 12 - 50 | 5  | 48 / 1680   | RR | 0.78 (0.51 to 1.19) | 0.25  | 0  | 0.39 to 1.55   | None                |

\* Represented as median or range of follow-up duration of individual studies.

† Summary estimate smaller than 1 favors experimental arm (lower mortality in experimental arm); effect estimate larger than 1 favors control arm (lower mortality in control arm)

‡ Any of the following: large heterogeneity, signs of small study effects, or signs of excess significance bias.

All statistical tests are two-sided.

Abbreviations: ACEI, angiotensin-converting enzyme inhibitor; ARB, angiotensin receptor blocker; BMS, bare metal stent; CI, confidence interval; CKD, chronic kidney disease; DES, drug-eluting stent; DPP-4, Dipeptidylpeptidase-4; ESA, erythropoiesis-stimulating agent; HD, hemodialysis; HR, hazard ratio; ICD, implantable cardioverter defibrillator; NA, not available; NR, not reported; OR, odds ratio; PD, peritoneal dialysis; RR, risk ratio; SGLT-2, sodium glucose cotransporter-2; vs., versus

**Table S4. Details of credibility assessment in meta-analyses of observational studies associating clinical intervention and all-cause mortality of patients with chronic kidney disease**

| Author, year             | Comparison (experimental arm vs. control arm)                                           | CKD stage | Effect metrics | Fixed effects summary estimate* | Fixed effects p value | Largest study summary estimate (95% CI)* | Egger p value | Excess significance test p value                                                                      | Random effects summary estimate (95% CI) under 5%/10%/15%/20% credibility ceiling*    | I2 (%) under random effects/5%/10%/15%/20% credibility ceiling |
|--------------------------|-----------------------------------------------------------------------------------------|-----------|----------------|---------------------------------|-----------------------|------------------------------------------|---------------|-------------------------------------------------------------------------------------------------------|---------------------------------------------------------------------------------------|----------------------------------------------------------------|
| Wang, et al. 2018        | Off-pump CABG vs. on-pump CABG                                                          | 3-5       | OR             | 0.88 (0.83 to 0.94)             | 0.00016               | 0.9 (0.84 to 0.97)                       | 0.0029        | The expected number of significant studies was larger than the observed number of significant studies | 0.87 (0.79 to 0.96) / 0.87 (0.76 to 0.98) / 0.86 (0.74 to 1.01) / 0.85 (0.71 to 1.03) | 23/0/0/0                                                       |
| Volodarskiy, et al. 2016 | CABG vs. medical therapy                                                                | 3-5       | RR             | 0.91 (0.84 to 0.99)             | 0.035                 | 1.07 (0.97 to 1.18)                      | 0.37          | Random effect summary estimate was not significant                                                    | 0.87 (0.65 to 1.18) / 0.96 (0.73 to 1.24) / 1.03 (0.84 to 1.25) / 1.06 (0.91 to 1.22) | 93/62/42/13/0                                                  |
| Volodarskiy, et al. 2016 | CABG vs. medical therapy                                                                | 5D        | RR             | 0.89 (0.76 to 1.04)             | 0.15                  | 0.87 (0.73 to 1.04)                      | 0.93          | Random effect summary estimate was not significant                                                    | 0.91 (0.65 to 1.28) / 0.94 (0.68 to 1.31) / 0.95 (0.7 to 1.31) / 0.94 (0.72 to 1.23)  | 67/59/50/31/0                                                  |
| Volodarskiy, et al. 2016 | CABG vs. medical therapy                                                                | 3-5       | RR             | 1.06 (0.79 to 1.43)             | 0.7                   | 1.26 (0.86 to 1.85)                      | 0.3           | Random effect summary estimate was not significant                                                    | 1.06 (0.79 to 1.43) / 1.06 (0.79 to 1.43) / 1.03 (0.75 to 1.43) / 0.99 (0.69 to 1.41) | 0/0/0/0                                                        |
| Volodarskiy, et al. 2016 | CABG vs. medical therapy                                                                | 5D        | RR             | 1.17 (0.82 to 1.65)             | 0.39                  | 1.26 (0.86 to 1.85)                      | NA            | Random effect summary estimate was not significant                                                    | 1.17 (0.82 to 1.65) / 1.17 (0.82 to 1.65) / 1.15 (0.78 to 1.68) / 1.11 (0.71 to 1.74) | 0/0/0/0                                                        |
| Kannan, et al. 2016      | CABG vs. PCI                                                                            | <5        | OR             | 0.82 (0.76 to 0.88)             | 0.00000028            | 0.81 (0.75 to 0.88)                      | 0.67          | The expected number of significant studies was larger than the observed number of significant studies | 0.85 (0.7 to 1.03) / 0.87 (0.69 to 1.08) / 0.88 (0.69 to 1.12) / 0.9 (0.69 to 1.18)   | 0/0/0/0                                                        |
| Ren, et al. 2014         | CABG vs. PCI                                                                            | 5D        | OR             | 0.87 (0.84 to 0.89)             | 5.7E-20               | 0.81 (0.76 to 0.85)                      | 0.59          | Random effect summary estimate was not significant                                                    | 0.93 (0.81 to 1.08) / 0.96 (0.85 to 1.08) / 0.99 (0.89 to 1.11) / 1 (0.87 to 1.14)    | 82/33/8/0/0                                                    |
| Volodarskiy, et al. 2016 | CABG vs. PCI                                                                            | 5D        | RR             | 2.31 (2.15 to 2.48)             | 4.4E-119              | 2.41 (2.15 to 2.71)                      | 0.88          | The expected number of significant studies was larger than the observed number of significant studies | 1.89 (1.3 to 2.77) / 1.66 (1.1 to 2.5) / 1.48 (0.93 to 2.37) / 1.48 (0.84 to 2.61)    | 40/9/0/0/0                                                     |
| Volodarskiy, et al. 2016 | CABG vs. PCI                                                                            | 3-5       | RR             | 2.21 (2.06 to 2.37)             | 8.1E-112              | 2.41 (2.15 to 2.71)                      | 0.19          | The expected number of significant studies was larger than the observed number of significant studies | 1.44 (1 to 2.06) / 1.22 (0.88 to 1.71) / 1.03 (0.76 to 1.37) / 1 (0.72 to 1.4)        | 75/42/22/0/0                                                   |
| Volodarskiy, et al. 2016 | PCI vs. medical therapy for coronary revascularization therapy                          | 5D        | RR             | 0.86 (0.77 to 0.96)             | 0.0085                | 1.11 (0.95 to 1.29)                      | 0.042         | Random effect summary estimate was not significant                                                    | 0.79 (0.58 to 1.08) / 0.85 (0.64 to 1.13) / 0.91 (0.71 to 1.17) / 0.99 (0.8 to 1.21)  | 85/64/49/25/0                                                  |
| Volodarskiy, et al. 2016 | PCI vs. medical therapy for coronary revascularization therapy                          | 3-5       | RR             | 0.79 (0.74 to 0.84)             | 3.3E-13               | 1.06 (0.96 to 1.18)                      | 0.26          | 0.00048                                                                                               | 0.8 (0.67 to 0.94) / 0.86 (0.73 to 1.01) / 0.99 (0.9 to 1.09) / 0.99 (0.88 to 1.11)   | 82/47/26/1/0                                                   |
| Volodarskiy, et al. 2016 | PCI vs. medical therapy for coronary revascularization therapy                          | 3-5       | RR             | 0.84 (0.72 to 0.97)             | 0.018                 | 0.9 (0.74 to 1.09)                       | 0.89          | Random effect summary estimate was not significant                                                    | 0.88 (0.68 to 1.14) / 0.9 (0.76 to 1.06) / 0.9 (0.76 to 1.07) / 0.9 (0.73 to 1.1)     | 66/36/0/0/0                                                    |
| Volodarskiy, et al. 2016 | PCI vs. medical therapy for coronary revascularization therapy                          | 5D        | RR             | 0.57 (0.4 to 0.81)              | 0.0019                | 0.49 (0.32 to 0.75)                      | NA            | The expected number of significant studies was larger than the observed number of significant studies | 0.68 (0.41 to 1.15) / 0.72 (0.41 to 1.26) / 0.75 (0.42 to 1.35) / 0.77 (0.42 to 1.42) | 44/0/0/0/0                                                     |
| Yang, et al. 2018        | Limus-eluting stent vs. paclitaxel-eluting stent for coronary revascularization therapy | 3-5       | OR             | 0.79 (0.67 to 0.94)             | 0.0065                | 0.73 (0.52 to 1.03)                      | 0.14          | Unobtainable because necessary data was not reported                                                  | 0.82 (0.69 to 0.98) / 0.87 (0.72 to 1.05) / 0.9 (0.74 to 1.1) / 0.93 (0.75 to 1.14)   | 9/0/0/0/0                                                      |
| Lu, et al. 2016          | DES vs. BMS for coronary revascularization therapy                                      | Any       | OR             | 0.86 (0.84 to 0.89)             | 1.8E-26               | 0.85 (0.82 to 0.89)                      | 0.21          | Unobtainable because necessary data was not reported                                                  | 0.9 (0.8 to 1.01) / 0.96 (0.87 to 1.06) / 1.01 (0.93 to 1.09) / 1.01 (0.92 to 1.11)   | 81/43/14/0/0                                                   |
| Khera, et al. 2018       | DES vs. BMS for coronary revascularization therapy                                      | 5D        | OR             | 0.82 (0.79 to 0.85)             | 7.7E-27               | 0.74 (0.71 to 0.78)                      | 0.54          | Unobtainable because necessary data was not reported                                                  | 0.84 (0.73 to 0.97) / 0.92 (0.83 to 1.03) / 0.97 (0.89 to 1.06) / 0.97 (0.87 to 1.08) | 86/39/9/0/0                                                    |
| Wang, et al. 2018        | DES vs. BMS for coronary revascularization therapy                                      | 5D        | OR             | 0.88 (0.85 to 0.92)             | 2.2E-09               | 0.81 (0.77 to 0.86)                      | 0.32          | Unobtainable because necessary data was not reported                                                  | 0.86 (0.74 to 1) / 1 (0.92 to 1.08) / 1 (0.91 to 1.1) / 0.99 (0.89 to 1.12)           | 76/25/0/0/0                                                    |
| Qin, et al. 2016         | ACEI or ARB vs. no ACEI or ARB                                                          | ND        | HR             | 0.82 (0.8 to 0.84)              | 3.4E-42               | 0.81 (0.78 to 0.84)                      | 0.74          | The expected number of significant studies was larger than the observed number of significant studies | 0.87 (0.82 to 0.93) / 0.89 (0.82 to 0.96) / 0.9 (0.83 to 0.98) / 0.91 (0.83 to 1)     | 44/0/0/0/0                                                     |
| Li, et al. 2018          | Combined RAAS blockade vs. ACEI or ARB                                                  | 5         | OR             | 0.77 (0.67 to 0.88)             | 0.000084              | 0.77 (0.64 to 0.92)                      | 0.36          | The expected number of significant studies was larger than the observed number of significant studies | 0.69 (0.5 to 0.96) / 0.68 (0.48 to 0.97) / 0.67 (0.46 to 0.98) / 0.66 (0.44 to 0.99)  | 50/50/50/48/44                                                 |

|                            |                                                                                                                                             |                  |    |                     |            |                     |         |                                                                                                       |                                                                                       |               |
|----------------------------|---------------------------------------------------------------------------------------------------------------------------------------------|------------------|----|---------------------|------------|---------------------|---------|-------------------------------------------------------------------------------------------------------|---------------------------------------------------------------------------------------|---------------|
| Lu, et al. 2016            | Spirolonactone vs. no mineralocorticoid receptors                                                                                           | Any              | RR | 0.9 (0.78 to 1.05)  | 0.19       | 1.05 (0.84 to 1.31) | 0.99    | Random effect summary estimate was not significant                                                    | 0.94 (0.77 to 1.16) / 0.98 (0.82 to 1.17) / 1 (0.83 to 1.19) / 1.01 (0.84 to 1.21)    | 59/25/0/0/0   |
| Shaw, et al. 2016          | Early invasive coronary angiography and/or revascularization for non ST elevation acute coronary syndrome vs. Initial conservative approach | Any              | HR | 0.5 (0.47 to 0.53)  | 8.2E-104   | 0.54 (0.49 to 0.6)  | 0.91    | Unobtainable because necessary data was not reported                                                  | 0.57 (0.45 to 0.72) / 0.57 (0.43 to 0.77) / 0.57 (0.4 to 0.83) / 0.57 (0.36 to 0.9)   | 79/0/0/0/0    |
| Shurrab, et al. 2018       | ICD for primary prevention of sudden cardiac death vs. no ICD                                                                               | 5D               | OR | 0.47 (0.39 to 0.56) | 1.3E-17    | 0.44 (0.36 to 0.53) | 0.3     | The expected number of significant studies was larger than the observed number of significant studies | 0.59 (0.39 to 0.89) / 0.64 (0.4 to 1.02) / 0.68 (0.4 to 1.15) / 0.72 (0.41 to 1.27)   | 17/0/0/0/0    |
| Fu, et al. 2017            | ICD for primary prevention of sudden cardiac death vs. no ICD                                                                               | 3-5              | HR | 0.8 (0.76 to 0.84)  | 9.9E-21    | 0.86 (0.81 to 0.91) | 0.28    | Unobtainable because necessary data was not reported                                                  | 0.82 (0.72 to 0.92) / 0.85 (0.75 to 0.96) / 0.87 (0.75 to 1) / 0.88 (0.76 to 1.03)    | 77/11/0/0/0   |
| Phan, et al. 2016          | Bioprosthetic vs. mechanical valve placement                                                                                                | 5D               | HR | 1.06 (1 to 1.12)    | 0.047      | 1.04 (0.98 to 1.1)  | 0.21    | Random effect summary estimate was not significant                                                    | 1.08 (0.95 to 1.24) / 1.04 (0.99 to 1.11) / 1.04 (0.97 to 1.12) / 1.04 (0.96 to 1.13) | 50/12/0/0/0   |
| Cheng, et al. 2018         | Trans-catheter vs. surgical aortic valve replacement                                                                                        | 5D               | OR | 0.78 (0.55 to 1.11) | 0.17       | 1.37 (0.68 to 2.77) | 0.86    | Random effect summary estimate was not significant                                                    | 0.86 (0.59 to 1.26) / 0.9 (0.61 to 1.33) / 0.92 (0.62 to 1.36) / 0.92 (0.62 to 1.38)  | 30/0/0/0/0    |
| Cheng, et al. 2018         | Trans-catheter vs. surgical aortic valve replacement                                                                                        | ND               | OR | 0.51 (0.43 to 0.61) | 1.2E-14    | 0.45 (0.37 to 0.55) | 0.2     | Random effect summary estimate was not significant                                                    | 0.71 (0.43 to 1.18) / 0.68 (0.44 to 1.04) / 0.66 (0.4 to 1.09) / 0.66 (0.36 to 1.22)  | 67/38/2/0/0   |
| Dahal, et al. 2016         | Warfarin for atrial fibrillation vs. no warfarin                                                                                            | ND               | HR | 0.64 (0.61 to 0.68) | 2.5E-57    | 0.63 (0.59 to 0.67) | 0.98    | The expected number of significant studies was larger than the observed number of significant studies | 0.7 (0.56 to 0.88) / 0.7 (0.52 to 0.94) / 0.7 (0.49 to 1.01) / 0.7 (0.45 to 1.1)      | 39/0/0/0/0    |
| Lei, et al. 2018           | Warfarin for atrial fibrillation vs. control                                                                                                | 5HD              | OR | 0.95 (0.89 to 1.02) | 0.17       | 1.05 (0.95 to 1.16) | 0.48    | Random effect summary estimate was not significant                                                    | 0.94 (0.84 to 1.04) / 0.99 (0.91 to 1.07) / 0.99 (0.92 to 1.08) / 0.99 (0.91 to 1.08) | 42/20/0/0/0   |
| Crowley, et al. 2017       | Metformin regimen for diabetes vs. control                                                                                                  | 3-5              | HR | 0.79 (0.74 to 0.84) | 2.2E-12    | 0.87 (0.77 to 0.99) | 0.93    | Unobtainable because necessary data was not reported                                                  | 0.87 (0.78 to 0.98) / 0.9 (0.8 to 1.01) / 0.92 (0.81 to 1.05) / 0.94 (0.81 to 1.08)   | 80/13/0/0/0   |
| Apetrii, et al. 2017       | Parathyroidectomy for secondary hyperparathyroidism vs. non-surgical treatment                                                              | 5D               | HR | 1.15 (0.97 to 1.36) | 0.11       | 0.8 (0.65 to 0.98)  | NA      | Random effect summary estimate was not significant                                                    | 1.26 (0.41 to 3.88) / 1.15 (0.4 to 3.36) / 1.03 (0.4 to 2.63) / 0.86 (0.49 to 1.5)    | 97/74/58/35/2 |
| Apetrii, et al. 2017       | Parathyroidectomy for secondary hyperparathyroidism vs. non-surgical treatment                                                              | 5D               | HR | 0.92 (0.89 to 0.94) | 1.9E-09    | 0.96 (0.92 to 1)    | 0.00014 | Unobtainable because necessary data was not reported                                                  | 0.84 (0.76 to 0.94) / 0.9 (0.83 to 0.98) / 0.93 (0.88 to 1) / 0.93 (0.86 to 1.01)     | 81/46/13/0/0  |
| Li, et al. 2017            | Total parathyroidectomy for secondary hyperparathyroidism vs. total parathyroidectomy with autotransplantation                              | Any              | RR | 0.82 (0.39 to 1.75) | 0.61       | 0.66 (0.22 to 1.96) | 0.55    | Random effect summary estimate was not significant                                                    | 0.82 (0.36 to 1.86) / 0.82 (0.36 to 1.86) / 0.89 (0.41 to 1.93) / 0.92 (0.42 to 1.99) | 11/11/11/0/0  |
| Yang, et al. 2015          | Statin vs. control                                                                                                                          | 5D with diabetes | HR | 0.83 (0.78 to 0.88) | 0.00000013 | 0.82 (0.76 to 0.89) | 0.37    | Unobtainable because necessary data was not reported                                                  | 0.86 (0.78 to 0.96) / 0.88 (0.79 to 0.98) / 0.88 (0.79 to 0.99) / 0.89 (0.79 to 1)    | 55/2/0/0/0    |
| Lu, et al. 2017            | Vitamin D or analogues vs. non-vitamin D treatment                                                                                          | 5D               | RR | 0.83 (0.81 to 0.85) | 4.1E-57    | 0.89 (0.86 to 0.93) | 0.019   | Unobtainable because necessary data was not reported                                                  | 0.75 (0.65 to 0.86) / 0.81 (0.71 to 0.92) / 0.96 (0.92 to 1.01) / 0.97 (0.92 to 1.01) | 94/54/27/0/0  |
| Lu, et al. 2017            | Vitamin D or analogues vs. non-vitamin D treatment                                                                                          | ND               | RR | 0.61 (0.49 to 0.75) | 0.0000025  | 0.76 (0.58 to 0.99) | 0.46    | Unobtainable because necessary data was not reported                                                  | 0.72 (0.54 to 0.94) / 0.73 (0.52 to 1.01) / 0.74 (0.5 to 1.07) / 0.75 (0.49 to 1.14)  | 76/0/0/0/0    |
| Scotland, et al. 2018      | Multiple-frequency bioimpedance devices for HD fluid management vs. standard clinical assessment                                            | Any              | HR | 0.83 (0.41 to 1.68) | 0.61       | 1.33 (0.48 to 3.68) | 0.12    | Random effect summary estimate was not significant                                                    | 0.82 (0.32 to 2.12) / 0.97 (0.47 to 2.01) / 1 (0.48 to 2.08) / 1.03 (0.49 to 2.14)    | 54/34/1/0/0   |
| Wongrakpanich, et al. 2017 | Dialysis therapy vs. conservative management                                                                                                | 5                | HR | 0.58 (0.44 to 0.75) | 0.000048   | 0.46 (0.31 to 0.68) | 0.6     | The expected number of significant studies was larger than the observed number of significant studies | 0.63 (0.36 to 1.11) / 0.77 (0.53 to 1.11) / 0.79 (0.54 to 1.16) / 0.81 (0.55 to 1.19) | 73/33/0/0/0   |
| Zhao, et al. 2018          | Earlier HD vs. later HD                                                                                                                     | 5                | HR | 1.05 (1.04 to 1.06) | 2.3E-37    | 1.04 (1.03 to 1.05) | 0.078   | Unobtainable because necessary data was not reported                                                  | 1.05 (1.01 to 1.1) / 1.03 (1 to 1.06) / 1.03 (1 to 1.07) / 1.03 (0.99 to 1.07)        | 98/25/0/0/0   |
| Zhao, et al. 2018          | Earlier PD vs. later PD                                                                                                                     | 5                | HR | 1.03 (1.01 to 1.05) | 0.0003     | 1.03 (1.01 to 1.06) | 0.54    | Random effect summary estimate was not significant                                                    | 1.03 (0.99 to 1.08) / 1.03 (1 to 1.06) / 1.03 (1 to 1.07) / 1.03 (0.99 to 1.08)       | 49/26/0/0/0   |

|                         |                                                                                                      |              |    |                     |          |                     |        |                                                                                                       |                                                                                       |              |
|-------------------------|------------------------------------------------------------------------------------------------------|--------------|----|---------------------|----------|---------------------|--------|-------------------------------------------------------------------------------------------------------|---------------------------------------------------------------------------------------|--------------|
| Ravani, et al. 2013     | Catheter as HD access vs. fistula                                                                    | 5HD          | RR | 1.41 (1.38 to 1.45) | 1.1E-161 | 1.3 (1.25 to 1.35)  | 0.085  | Unobtainable because necessary data was not reported                                                  | 1.33 (1.2 to 1.47) / 1.28 (1.14 to 1.44) / 1.23 (1.08 to 1.41) / 1.19 (1.03 to 1.37)  | 83/0/0/0     |
| Ravani, et al. 2013     | Catheter as HD access vs. graft                                                                      | 5HD          | RR | 1.36 (1.33 to 1.39) | 8.8E-126 | 1.46 (1.41 to 1.51) | 0.97   | Unobtainable because necessary data was not reported                                                  | 1.19 (1.1 to 1.28) / 1.17 (1.07 to 1.28) / 1.16 (1.05 to 1.28) / 1.16 (1.03 to 1.3)   | 85/0/0/0     |
| Ravani, et al. 2013     | Graft as HD access vs. fistula                                                                       | 5HD          | RR | 1.17 (1.14 to 1.2)  | 1.5E-38  | 1.05 (1 to 1.1)     | 0.71   | Unobtainable because necessary data was not reported                                                  | 1.08 (1.04 to 1.13) / 1.08 (1.03 to 1.14) / 1.08 (1.01 to 1.14) / 1.07 (1 to 1.15)    | 81/0/0/0     |
| Zhou, et al. 2018       | HD vs. PD                                                                                            | Any with PKD | RR | 1.16 (0.99 to 1.35) | 0.064    | 1.4 (1.13 to 1.74)  | 0.084  | Random effect summary estimate was not significant                                                    | 1.04 (0.86 to 1.26) / 1.01 (0.82 to 1.23) / 1 (0.81 to 1.23) / 1 (0.8 to 1.24)        | 35/0/0/0     |
| Han, et al. 2015        | HD vs. PD                                                                                            | 5            | HR | 0.91 (0.89 to 0.94) | 2.1E-09  | 0.83 (0.79 to 0.88) | 0.54   | Unobtainable because necessary data was not reported                                                  | 0.92 (0.85 to 1) / 0.94 (0.87 to 1.01) / 0.94 (0.88 to 1.01) / 0.95 (0.87 to 1.02)    | 83/50/22/0/0 |
| Mathew, et al. 2018     | Intensive HD vs. PD                                                                                  | 5            | HR | 0.74 (0.69 to 0.79) | 1.2E-19  | 0.8 (0.73 to 0.88)  | 0.074  | Unobtainable because necessary data was not reported                                                  | 0.76 (0.62 to 0.93) / 0.76 (0.58 to 0.99) / 0.76 (0.55 to 1.05) / 0.76 (0.51 to 1.14) | 91/0/0/0     |
| Jin, et al. 2013        | Prolonged nocturnal or daytime HD vs. conventional HD                                                | 5            | OR | 0.81 (0.77 to 0.85) | 2E-15    | 0.9 (0.83 to 0.98)  | 0.0018 | Unobtainable because necessary data was not reported                                                  | 0.84 (0.77 to 0.91) / 0.84 (0.75 to 0.93) / 0.84 (0.74 to 0.95) / 0.84 (0.72 to 0.98) | 68/0/0/0     |
| Shi, et al. 2018        | Multidisciplinary care vs. no multidisciplinary care                                                 | Any          | OR | 0.68 (0.57 to 0.81) | 0.000021 | 0.8 (0.53 to 1.21)  | 0.17   | 0.19                                                                                                  | 0.74 (0.55 to 0.99) / 0.8 (0.61 to 1.05) / 0.84 (0.66 to 1.07) / 0.83 (0.62 to 1.11)  | 70/44/21/0/0 |
| Smart, et al. 2014      | Early referral to specialist nephrology services vs. late referral to specialist nephrology services | Any          | RR | 0.67 (0.64 to 0.71) | 6.4E-47  | 0.83 (0.77 to 0.9)  | 0.035  | The expected number of significant studies was larger than the observed number of significant studies | 0.7 (0.61 to 0.82) / 0.7 (0.59 to 0.84) / 0.71 (0.57 to 0.88) / 0.72 (0.56 to 0.93)   | 82/0/0/0     |
| Kelly, et al. 2017      | Healthy dietary pattern low on red meat, sodium, and refined sugar vs. control                       | 3-5          | RR | 0.75 (0.66 to 0.87) | 0.000069 | 0.77 (0.61 to 0.97) | 0.61   | The expected number of significant studies was larger than the observed number of significant studies | 0.79 (0.67 to 0.94) / 0.81 (0.67 to 0.98) / 0.83 (0.68 to 1.02) / 0.85 (0.68 to 1.06) | 0/0/0/0      |
| Remschmidt, et al. 2014 | Influenza vaccine vs. control                                                                        | 5            | OR | 0.71 (0.7 to 0.72)  | 0        | 0.71 (0.7 to 0.72)  | 0.64   | Unobtainable because necessary data was not reported                                                  | 0.73 (0.59 to 0.89) / 0.73 (0.56 to 0.94) / 0.73 (0.53 to 1) / 0.73 (0.49 to 1.07)    | 83/0/0/0     |

\* Effect estimate smaller than 1 favors experimental arm (lower mortality in experimental arm); effect estimate larger than 1 favors control arm (lower mortality in control arm)

All statistical tests are two-sided.

Abbreviations: ACEI, angiotensin-converting enzyme inhibitor; ARB, angiotensin receptor blocker; BMS, bare metal stent; CABG, coronary artery bypass; CI, confidence interval; CKD, chronic kidney disease; DES, drug-eluting stent; HD, hemodialysis; HR, hazard ratio; ICD, implantable cardioverter defibrillator; NA, not available; OR, odds ratio; PCI, percutaneous intervention; PD, peritoneal dialysis; RAAS, renin-angiotensin-aldosterone system; RR, risk ratio; vs., versus

**Table S5. Details of credibility assessment in meta-analyses of randomized controlled trials associating clinical intervention and all-cause mortality of patients with chronic kidney disease**

| Author, year             | Comparison (experimental arm vs. control arm)                                                                                               | CKD stage                | Effect metrics | Fixed effects summary estimate* | Fixed effects p value | Largest study summary estimate (95% CI)* | Egger p value | Excess significance test p value                                                                      |
|--------------------------|---------------------------------------------------------------------------------------------------------------------------------------------|--------------------------|----------------|---------------------------------|-----------------------|------------------------------------------|---------------|-------------------------------------------------------------------------------------------------------|
| Hahn, et al. 2017        | Epoetin $\alpha$ for anemia treatment every 2 weeks vs. weekly                                                                              | 5D                       | RR             | 0.89 (0.38 to 2.09)             | 0.79                  | 0.67 (0.19 to 2.34)                      | 0.0098        | Random effect summary estimate was not significant                                                    |
| Palmer, et al. 2014      | Epoetin $\beta$ for anemia treatment vs. control therapy                                                                                    | Any                      | OR             | 0.7 (0.36 to 1.33)              | 0.27                  | 0.76 (0.37 to 1.57)                      | 0.19          | Random effect summary estimate was not significant                                                    |
| Amato, et al. 2018       | Epoetin $\alpha$ for anemia treatment vs. biosimilar ESA                                                                                    | Any                      | RR             | 0.93 (0.62 to 1.38)             | 0.72                  | 1.23 (0.6 to 2.52)                       | 0.69          | Random effect summary estimate was not significant                                                    |
| Palmer, et al. 2014      | Darbepoetin $\alpha$ intravenous injection for anemia treatment vs. subcutaneous injection                                                  | 5D                       | RR             | 1.29 (0.33 to 5.12)             | 0.72                  | 0.77 (0.13 to 4.49)                      | NA            | Random effect summary estimate was not significant                                                    |
| Palmer, et al. 2010      | High vs. low hemoglobin target for anemia treatment                                                                                         | 2-5                      | RR             | 1.09 (0.99 to 1.2)              | 0.072                 | 1.05 (0.93 to 1.19)                      | 0.13          | Random effect summary estimate was not significant                                                    |
| Ye, et al. 2018          | High vs. low hemoglobin target for anemia treatment                                                                                         | 5D                       | RR             | 1.11 (0.95 to 1.3)              | 0.19                  | 1.21 (1.01 to 1.44)                      | 0.19          | Random effect summary estimate was not significant                                                    |
| Volodarskiy, et al. 2018 | 1st, 2nd generation DES vs. BMS for coronary revascularization therapy                                                                      | 3-5                      | RR             | 0.99 (0.78 to 1.27)             | 0.96                  | 1.03 (0.72 to 1.47)                      | 0.66          | Random effect summary estimate was not significant                                                    |
| Sharma, et al. 2011      | ACEI vs. placebo                                                                                                                            | 3 without diabetes       | RR             | 0.7 (0.53 to 0.93)              | 0.015                 | 0.67 (0.5 to 0.89)                       | NA            | Random effect summary estimate was not significant                                                    |
| Liu, et al. 2017         | ACEI or ARB single agent vs. placebo or active control                                                                                      | 5D                       | RR             | 0.94 (0.75 to 1.17)             | 0.59                  | 1.09 (0.78 to 1.52)                      | 0.54          | Random effect summary estimate was not significant                                                    |
| Nistor, et al. 2018      | ACEI or ARB single agent vs. placebo or active control                                                                                      | 3-5ND with diabetes      | RR             | 0.97 (0.85 to 1.1)              | 0.6                   | 1.03 (0.85 to 1.25)                      | 0.84          | Random effect summary estimate was not significant                                                    |
| Badve, et al. 2011       | Beta-blockers for heart failure vs. placebo                                                                                                 | 3-5                      | RR             | 0.72 (0.64 to 0.8)              | 2.6E-09               | 0.76 (0.64 to 0.91)                      | 0.33          | The expected number of significant studies was larger than the observed number of significant studies |
| Heerspink, et al. 2009   | More intensive vs. less intensive blood pressure target                                                                                     | 5D                       | RR             | 0.8 (0.71 to 0.91)              | 0.00038               | 0.8 (0.68 to 0.94)                       | 0.53          | The expected number of significant studies was larger than the observed number of significant studies |
| Malhotra, et al. 2017    | More intensive vs. less intensive blood pressure target                                                                                     | 3-5ND                    | OR             | 0.86 (0.76 to 0.96)             | 0.01                  | 0.86 (0.66 to 1.12)                      | 0.081         | The expected number of significant studies was larger than the observed number of significant studies |
| Zhao, et al. 2016        | Calcium channel blockers vs. ACEI or ARB                                                                                                    | Any                      | OR             | 0.96 (0.89 to 1.03)             | 0.21                  | 0.97 (0.88 to 1.07)                      | 0.22          | Random effect summary estimate was not significant                                                    |
| Lu, et al. 2016          | Spirololactone or eplerenone vs. no mineralocorticoid receptors                                                                             | Any                      | RR             | 0.72 (0.58 to 0.91)             | 0.0048                | 0.87 (0.67 to 1.13)                      | 0.16          | Unobtainable because necessary data was not reported                                                  |
| Quach, et al. 2016       | Spirololactone or eplerenone vs. placebo or none                                                                                            | 5                        | RR             | 0.4 (0.23 to 0.7)               | 0.0012                | 0.32 (0.16 to 0.64)                      | 0.76          | The expected number of significant studies was larger than the observed number of significant studies |
| Zeng, et al. 2018        | Bivalirudin for coronary artery disease vs. heparin plus glycoprotein IIb/IIIa inhibitors                                                   | Any                      | RR             | 1.12 (0.81 to 1.53)             | 0.5                   | 1.07 (0.61 to 1.87)                      | 0.42          | Random effect summary estimate was not significant                                                    |
| Palmer, et al. 2013      | Antiplatelet agent for general CKD patients vs. control therapy                                                                             | 3-5                      | RR             | 0.96 (0.87 to 1.07)             | 0.49                  | 0.93 (0.75 to 1.16)                      | 0.091         | Random effect summary estimate was not significant                                                    |
| Shaw, et al. 2016        | Early invasive coronary angiography and/or revascularization for non ST elevation acute coronary syndrome vs. initial conservative approach | Any                      | HR             | 0.76 (0.51 to 1.12)             | 0.17                  | 0.67 (0.32 to 1.4)                       | 0.78          | Random effect summary estimate was not significant                                                    |
| Pun, et al. 2014         | ICD for primary prevention of sudden cardiac death vs. no ICD                                                                               | 3b                       | HR             | 0.82 (0.66 to 1.01)             | 0.068                 | 0.93 (0.68 to 1.27)                      | 0.4           | Random effect summary estimate was not significant                                                    |
| Pun, et al. 2014         | ICD for primary prevention of sudden cardiac death vs. no ICD                                                                               | 1                        | HR             | 0.48 (0.34 to 0.67)             | 0.000017              | 0.55 (0.33 to 0.9)                       | 0.16          | Unobtainable because necessary data was not reported                                                  |
| He, et al. 2018          | N-acetylcysteine after cardiac surgery vs. placebo                                                                                          | Any                      | RR             | 0.64 (0.29 to 1.4)              | 0.26                  | 1.21 (0.33 to 4.42)                      | 0.045         | Random effect summary estimate was not significant                                                    |
| Wang, et al. 2018        | Cinacalcet and/or vitamin D analogue or phosphate binders vs. placebo and/or vitamin D analogue or phosphate binders                        | 3-5                      | RR             | 0.97 (0.89 to 1.05)             | 0.42                  | 0.97 (0.89 to 1.05)                      | 0.28          | Random effect summary estimate was not significant                                                    |
| Lo, et al. 2018          | DPP-4 inhibitor for diabetes vs. placebo                                                                                                    | 3-5 with diabetes        | RR             | 0.89 (0.75 to 1.06)             | 0.19                  | 0.88 (0.74 to 1.05)                      | 0.37          | Random effect summary estimate was not significant                                                    |
| Toyama, et al. 2019      | SGLT-2 inhibitor for diabetes vs. placebo                                                                                                   | 3-5 with type 2 diabetes | RR             | 0.86 (0.73 to 1.01)             | 0.069                 | 0.88 (0.67 to 1.15)                      | 0.15          | Random effect summary estimate was not significant                                                    |
| Ruospo, et al. 2018      | Iron-based phosphate binders vs. placebo or usual care                                                                                      | Any                      | RR             | 0.52 (0.06 to 4.61)             | 0.55                  | 0.2 (0.01 to 4.02)                       | NA            | Random effect summary estimate was not significant                                                    |
| Habbous, et al. 2017     | Lanthanum carbonate vs. calcium-based phosphate binders                                                                                     | 3-5                      | RR             | 0.73 (0.18 to 3)                | 0.66                  | 0.52 (0.05 to 5.38)                      | 0.93          | Random effect summary estimate was not significant                                                    |

|                          |                                                                                                        |       |    |                     |           |                      |       |                                                                                                       |
|--------------------------|--------------------------------------------------------------------------------------------------------|-------|----|---------------------|-----------|----------------------|-------|-------------------------------------------------------------------------------------------------------|
| Wang, et al. 2018        | Lanthanum carbonate vs. calcium-based phosphate binders or sevelamer                                   | 5HD   | OR | 0.45 (0.32 to 0.63) | 0.0000029 | 0.4 (0.27 to 0.59)   | 0.11  | The expected number of significant studies was larger than the observed number of significant studies |
| Sekercioglu, et al. 2016 | Non-calcium-based phosphate binders vs. calcium-based phosphate binders                                | 3-5   | RR | 0.84 (0.75 to 0.93) | 0.0015    | 0.97 (0.84 to 1.12)  | 0.14  | Unobtainable because necessary data was not reported                                                  |
| Habbous, et al. 2017     | Sevelamer vs. calcium-based phosphate binders                                                          | 3-5   | RR | 0.82 (0.71 to 0.93) | 0.0022    | 0.98 (0.85 to 1.13)  | 0.35  | Random effect summary estimate was not significant                                                    |
| Zhang, et al. 2014       | Statin vs. less statin or placebo                                                                      | ND    | RR | 0.79 (0.73 to 0.85) | 1.2E-09   | 0.8 (0.73 to 0.88)   | 0.54  | The expected number of significant studies was larger than the observed number of significant studies |
| Sun, et al. 2015         | Statin vs. placebo                                                                                     | 5D    | RR | 0.98 (0.93 to 1.03) | 0.41      | 0.96 (0.89 to 1.04)  | 0.85  | Random effect summary estimate was not significant                                                    |
| Lu, et al. 2017          | Vitamin D or analogues vs. non-vitamin D treatment                                                     | 5D    | RR | 1.13 (0.63 to 2.03) | 0.68      | 1.15 (0.41 to 3.21)  | 0.082 | Random effect summary estimate was not significant                                                    |
| Lu, et al. 2017          | Vitamin D or analogues vs. non-vitamin D treatment                                                     | ND    | RR | 1.55 (0.52 to 4.62) | 0.44      | 3.91 (0.45 to 34.13) | 0.06  | Random effect summary estimate was not significant                                                    |
| Wang, et al. 2014        | Hemodiafiltration vs. conventional HD                                                                  | 5     | RR | 0.85 (0.74 to 0.97) | 0.017     | 0.94 (0.78 to 1.14)  | 0.77  | Random effect summary estimate was not significant                                                    |
| Wang, et al. 2014        | Hemofiltration vs. conventional HD                                                                     | 5     | RR | 0.55 (0.26 to 1.16) | 0.12      | 0.58 (0.26 to 1.29)  | 0.77  | Random effect summary estimate was not significant                                                    |
| Nistor, et al. 2015      | Hemofiltration or hemodiafiltration or acetate-free biofiltration vs. conventional HD                  | 5     | RR | 0.87 (0.77 to 0.98) | 0.022     | 0.94 (0.78 to 1.14)  | 0.91  | Random effect summary estimate was not significant                                                    |
| Song, et al. 2010        | Renal replacement therapy for prevention of acute kidney injury vs. control                            | 3-5   | OR | 0.36 (0.14 to 0.9)  | 0.029     | 0.2 (0.05 to 0.88)   | 0.85  | Random effect summary estimate was not significant                                                    |
| Wang, et al. 2016        | Citrate for alternative HD catheter lock solution vs. heparin 5000 IU/mL                               | 5HD   | RR | 0.88 (0.54 to 1.43) | 0.6       | 1.4 (0.61 to 3.21)   | 0.94  | Random effect summary estimate was not significant                                                    |
| McCann, et al. 2010      | Topical antimicrobial ointment usage in central venous catheter HD patients vs. no ointment or placebo | 5HD   | RR | 0.37 (0.16 to 0.85) | 0.019     | 0.22 (0.07 to 0.72)  | 0.74  | Random effect summary estimate was not significant                                                    |
| Wang, et al. 2016        | Systematic warfarin for preventing central venous HD catheter malfunction vs. placebo                  | 5HD   | RR | 0.78 (0.37 to 1.66) | 0.52      | 0.63 (0.21 to 1.86)  | 0.67  | Random effect summary estimate was not significant                                                    |
| Tan, et al. 2018         | High-flux HD vs. low-flux HD                                                                           | 5     | RR | 0.71 (0.63 to 0.8)  | 8.5E-09   | 0.68 (0.53 to 0.87)  | 0.65  | The expected number of significant studies was larger than the observed number of significant studies |
| Htay, et al. 2018        | Low glucose degradation product PD dialysate vs. standard glucose dialysate                            | 5PD   | RR | 0.74 (0.47 to 1.14) | 0.17      | 1.14 (0.46 to 2.82)  | 0.51  | Random effect summary estimate was not significant                                                    |
| Htay, et al. 2018        | Glucose polymer PD dialysate vs. standard glucose dialysate                                            | 5PD   | RR | 0.82 (0.42 to 1.59) | 0.55      | 0.82 (0.32 to 2.12)  | 0.66  | Random effect summary estimate was not significant                                                    |
| Xie, et al. 2011         | Coiled intraperitoneal segment PD catheters vs. straight intraperitoneal segment catheters             | 5PD   | RR | 0.94 (0.56 to 1.57) | 0.81      | 0.91 (0.44 to 1.89)  | 0.21  | Random effect summary estimate was not significant                                                    |
| Sampson, et al. 2017     | Allopurinol as uric acid lowering therapy vs. usual care                                               | Any   | RR | 0.13 (0.02 to 1.06) | 0.056     | 0.09 (0.01 to 1.61)  | NA    | Random effect summary estimate was not significant                                                    |
| Jun, et al. 2012         | Antioxidants vs. control                                                                               | 3-5   | RR | 0.93 (0.76 to 1.14) | 0.46      | 0.9 (0.69 to 1.18)   | 0.93  | Random effect summary estimate was not significant                                                    |
| Shi, et al. 2018         | Multidisciplinary care vs. no multidisciplinary care                                                   | Any   | OR | 0.81 (0.61 to 1.08) | 0.15      | 0.9 (0.62 to 1.3)    | 0.59  | Random effect summary estimate was not significant                                                    |
| Valentijn, et al. 2018   | Person-centered integrated care vs. control                                                            | Any   | RR | 0.85 (0.7 to 1.04)  | 0.11      | 0.86 (0.65 to 1.13)  | 0.31  | Random effect summary estimate was not significant                                                    |
| Silver, et al. 2017      | Quality improvement strategy vs. usual care                                                            | 3-5   | RR | 0.91 (0.75 to 1.12) | 0.37      | 0.91 (0.68 to 1.22)  | 0.32  | Random effect summary estimate was not significant                                                    |
| Palmer, et al. 2017      | Dietary counselling vs. control                                                                        | 3-5   | RR | 1.58 (0.6 to 4.18)  | 0.36      | 1.53 (0.44 to 5.29)  | 0.72  | Random effect summary estimate was not significant                                                    |
| Jun, et al. 2012         | Fibrate vs. placebo                                                                                    | 3     | RR | 0.86 (0.63 to 1.19) | 0.37      | 0.8 (0.54 to 1.18)   | NA    | Random effect summary estimate was not significant                                                    |
| Jun, et al. 2012         | Fibrate vs. placebo                                                                                    | 1-2   | RR | 1.02 (0.91 to 1.15) | 0.69      | 1.13 (0.97 to 1.32)  | NA    | Random effect summary estimate was not significant                                                    |
| Nigwekar, et al. 2016    | Folic acid and/or vitamin B6 and/or vitamin B12 vs. control                                            | 5D    | RR | 1 (0.9 to 1.12)     | 1         | 1.03 (0.87 to 1.21)  | 0.11  | Random effect summary estimate was not significant                                                    |
| Jardine, et al. 2012     | Folic acid and/or vitamin B6 and/or vitamin B12 vs. control                                            | 3-5   | RR | 1.04 (0.93 to 1.16) | 0.45      | 1.02 (0.9 to 1.15)   | 0.77  | Random effect summary estimate was not significant                                                    |
| Hahn, et al. 2018        | Low protein diet vs. normal protein diet                                                               | 3-5ND | RR | 0.78 (0.51 to 1.19) | 0.25      | 0.92 (0.54 to 1.56)  | 0.36  | Random effect summary estimate was not significant                                                    |



\* Effect estimate smaller than 1 favors experimental arm (lower mortality in experimental arm); effect estimate larger than 1 favors control arm (lower mortality in control arm)

All statistical tests are two-sided.

Abbreviations: ACEI, angiotensin-converting enzyme inhibitor; ARB, angiotensin receptor blocker; BMS, bare metal stent; CI, confidence interval; CKD, chronic kidney disease; DES, drug-eluting stent; DPP-4, Dipeptidylpeptidase-4; ESA, erythropoiesis-stimulating agent; HD, hemodialysis; HR, hazard ratio; ICD, implantable cardioverter defibrillator; NA, not available; OR, odds ratio; PD, peritoneal dialysis; RR, risk ratio; SGLT-2, sodium glucose cotransporter-2; vs., versus

**Table S6. Details of eligible meta-analysis unique in design but ineligible for re-analysis**

| Author, year               | Comparison (experimental arm vs. control arm)                                                                        | CKD stage                                                                  | Meta-analysis model                     | Effect metrics       | Effect estimate (95% CI)* | P value | I2 (%) |
|----------------------------|----------------------------------------------------------------------------------------------------------------------|----------------------------------------------------------------------------|-----------------------------------------|----------------------|---------------------------|---------|--------|
| Koulouridis, et al. 2013   | High vs. low first-3-month mean ESA dose in anemia treatment                                                         | 1-5                                                                        | Random effects meta-regression analysis | Incidence rate ratio | 1.48 (1.02 to 2.14)       | NR      | NR     |
| Koulouridis, et al. 2013   | High vs. low total-study-period mean ESA dose in anemia treatment                                                    | 1-5                                                                        | Random effects meta-regression analysis | Incidence rate ratio | 1.41 (1.08 to 1.82)       | 0.01    | NR     |
| Shepshelevich, et al. 2016 | Intravenous vs. oral iron replacement for anemia treatment                                                           | 1-5                                                                        | Random effects meta-analysis            | RR                   | 0.94 (0.55 to 1.63)       | NR      | NR     |
| Charytan, et al. 2016      | CABG vs. PCI                                                                                                         | 3-5ND                                                                      | Individual patient data meta-analysis   | HR                   | 0.99 (0.67 to 1.46)       | 0.96    | NA     |
| Charytan, et al. 2016      | CABG vs. PCI                                                                                                         | 3-5ND                                                                      | Individual patient data meta-analysis   | HR                   | 0.92 (0.54 to 1.58)       | NR      | NA     |
| Palmer, et al. 2015        | ARB vs. placebo                                                                                                      | Any with type 2 diabetes                                                   | Random effects meta-analysis            | OR                   | 0.91 (0.71 to 1.16)       | NR      | NR     |
| Palmer, et al. 2015        | ACEI vs. placebo                                                                                                     | Any with type 2 diabetes                                                   | Random effects meta-analysis            | OR                   | 0.85 (0.61 to 1.19)       | NR      | NR     |
| Xie, et al. 2016           | ACEI vs. placebo                                                                                                     | Any                                                                        | Random effects meta-analysis            | OR                   | 0.87 (0.76 to 0.99)       | NR      | 33     |
| Xie, et al. 2016           | ARB vs. placebo                                                                                                      | Any                                                                        | Random effects meta-analysis            | OR                   | 1.03 (0.89 to 1.21)       | NR      | 0      |
| Xie, et al. 2016           | ACEI vs. active control                                                                                              | Any                                                                        | Random effects meta-analysis            | OR                   | 0.69 (0.48 to 0.99)       | NR      | 0      |
| Xie, et al. 2016           | ARB vs. active control                                                                                               | Any                                                                        | Random effects meta-analysis            | OR                   | 0.88 (0.71 to 1.1)        | NR      | 0      |
| Xie, et al. 2016           | ACEI vs. ARB                                                                                                         | Any                                                                        | Random effects meta-analysis            | OR                   | 1.02 (0.36 to 2.91)       | NR      | NR     |
| Xie, et al. 2016           | Combined RAAS blockade vs. single RAAS blockade                                                                      | Any                                                                        | Random effects meta-analysis            | OR                   | 0.95 (0.77 to 1.16)       | NR      | 46     |
| Major, et al. 2016         | Aspirin for preventing cardiovascular diseases vs. placebo                                                           | ND                                                                         | Random effects meta-analysis            | RR                   | 0.74 (0.55 to 1)          | 0.05    | 0      |
| Wali, et al. 2011          | Calvedilol for heart failure vs. placebo                                                                             | 3-5ND                                                                      | Individual patient data meta-analysis   | HR                   | 0.76 (0.63 to 0.93)       | 0.007   | NA     |
| Greeviroj, et al. 2018     | Cinacalcet and/or vitamin D analogue or phosphate binders vs. placebo and/or vitamin D analogue or phosphate binders | 5D                                                                         | Random effects meta-analysis            | RR                   | 0.97 (0.89 to 1.05)       | 0.43    | 0      |
| Das, et al. 2018           | Oral patiomer for treating hyperkalemia vs. placebo                                                                  | 3-4 or non-CKD patients with heart failure, with high risk of hyperkalemia | Random effects meta-analysis            | RR                   | 0.31 (0.031 to 2.9)       | 0.3     | NR     |
| Herrington, et al. 2016    | Statin vs. less statin or placebo, per 1.0 mmol/L reduction in LDL cholesterol                                       | 1-2                                                                        | Individual patient data meta-analysis   | RR                   | 0.89 (0.85 to 0.93)       | NR      | NA     |
| Herrington, et al. 2016    | Statin vs. less statin or placebo, per 1.0 mmol/L reduction in LDL cholesterol                                       | 3a                                                                         | Individual patient data meta-analysis   | RR                   | 0.92 (0.86 to 0.98)       | NR      | NA     |
| Herrington, et al. 2016    | Statin vs. less statin or placebo, per 1.0 mmol/L reduction in LDL cholesterol                                       | 3b                                                                         | Individual patient data meta-analysis   | RR                   | 0.96 (0.88 to 1.04)       | NR      | NA     |
| Herrington, et al. 2016    | Statin vs. less statin or placebo, per 1.0 mmol/L reduction in LDL cholesterol                                       | 4-5ND                                                                      | Individual patient data meta-analysis   | RR                   | 0.94 (0.84 to 1.06)       | NR      | NA     |
| Herrington, et al. 2016    | Statin vs. less statin or placebo, per 1.0 mmol/L reduction in LDL cholesterol                                       | 5D                                                                         | Individual patient data meta-analysis   | RR                   | 0.97 (0.89 to 1.05)       | NR      | NA     |
| Peters, et al. 2016        | Online hemodiafiltration vs. conventional HD                                                                         | 5                                                                          | Individual patient data meta-analysis   | HR                   | 0.86 (0.75 to 0.99)       | NR      | NA     |
| He, et al. 2016            | Fish oil vs. placebo or other oil                                                                                    | 5HD                                                                        | Fixed effects meta-analysis             | RR                   | 0.83 (0.36 to 1.9)        | 0.66    | 0      |

\* Effect estimate smaller than 1 favors experimental arm (lower mortality in experimental arm); effect estimate larger than 1 favors control arm (lower mortality in control arm)

All statistical tests are two-sided.

Abbreviations: ACEI, angiotensin-converting enzyme inhibitor; ARB, angiotensin receptor blocker; CABG, coronary artery bypass; CI, confidence interval; CKD, chronic kidney disease; ESA, erythropoiesis-stimulating agent; HD, hemodialysis; HR, hazard ratio; LDL, low-density lipoprotein; NA, not available; NR, not reported; OR, odds ratio; PCI, percutaneous intervention; RAAS, renin-angiotensin-aldosterone system; RR, risk ratio; vs., versus

**Table S7. Comparisons of effect of treatment on all-cause mortality between evidences from different chronic kidney disease stages**

| Comparison (experimental arm vs. control arm)                 | Study design | Less severe CKD stage |               |                                                       |                     | More severe CKD stage |               |                                                       |                     | P value for heterogeneity <sup>b</sup> | Statistical significance           |
|---------------------------------------------------------------|--------------|-----------------------|---------------|-------------------------------------------------------|---------------------|-----------------------|---------------|-------------------------------------------------------|---------------------|----------------------------------------|------------------------------------|
|                                                               |              | CKD stage             | Effect metric | Random effects summary estimate (95% CI) <sup>a</sup> | Deaths / Population | CKD stage             | Effect metric | Random effects summary estimate (95% CI) <sup>a</sup> | Deaths / Population |                                        |                                    |
| High vs. low hemoglobin target                                | RCT          | 2-5                   | RR            | 1.09 (0.99 to 1.2)                                    | 1408 / 9951         | 5D                    | RR            | 1.11 (0.95 to 1.3)                                    | 483 / 3209          | 0.85                                   | Both not significant               |
| CABG vs. medical therapy, long-term acm                       | OS           | 3-5                   | RR            | 0.76 (0.5 to 1.15)                                    | 2335 / 6113         | 5D                    | RR            | 0.88 (0.62 to 1.26)                                   | 894 / 3160          | 0.59                                   | Both not significant               |
| CABG vs. medical therapy, short-term acm                      | OS           | 3-5                   | RR            | 1.06 (0.79 to 1.43)                                   | 459 / 3642          | 5D                    | RR            | 1.17 (0.82 to 1.65)                                   | 416 / 2645          | 0.69                                   | Both not significant               |
| CABG vs. PCI, long-term acm                                   | OS           | <5                    | OR            | 0.82 (0.76 to 0.88)                                   | 4327 / 15493        | 5D                    | OR            | 0.92 (0.8 to 1.06)                                    | 48664 / 77133       | 0.13                                   | <b>Less severe stage</b>           |
| CABG vs. PCI, short-term acm                                  | OS           | 3-5                   | RR            | 1.81 (1.47 to 2.24)                                   | 3470 / 55068        | 5D                    | RR            | 2.28 (1.99 to 2.6)                                    | 3347 / 52192        | <b>0.073</b>                           | Both significant in same direction |
| PCI vs. medical therapy, long-term acm                        | OS           | 3-5                   | RR            | 0.72 (0.6 to 0.86)                                    | 3801 / 12647        | 5D                    | RR            | 0.72 (0.52 to 1)                                      | 1120 / 3888         | 1                                      | Both significant in same direction |
| PCI vs. medical therapy, short-term acm                       | OS           | 3-5                   | RR            | 0.82 (0.61 to 1.11)                                   | 1158 / 7748         | 5D                    | RR            | 0.6 (0.36 to 0.99)                                    | 418 / 2854          | 0.29                                   | <b>More severe stage</b>           |
| DES vs. BMS, long-term acm                                    | OS           | Any                   | OR            | 0.79 (0.71 to 0.89)                                   | >1000 / 117247      | 5D                    | OR            | 0.75 (0.64 to 0.89)                                   | 24838 / 62863       | 0.62                                   | Both significant in same direction |
| ACEI or ARB vs. control                                       | RCT          | Any                   | OR            | 0.87 (0.76 to 0.99)                                   | 2159 / 17817        | 5D                    | RR            | 0.94 (0.75 to 1.17)                                   | 265 / 1746          | 0.55                                   | <b>Less severe stage</b>           |
| More intensive vs. less intensive blood pressure target       | RCT          | 3-5ND                 | OR            | 0.86 (0.76 to 0.96)                                   | 1293 / 15914        | 5D                    | RR            | 0.8 (0.66 to 0.96)                                    | 481 / 1571          | 0.51                                   | Both significant in same direction |
| Mineralocorticoid receptor antagonist                         | RCT          | Any                   | RR            | 0.58 (0.36 to 0.91)                                   | NR / 1724           | 5                     | RR            | 0.4 (0.23 to 0.7)                                     | 59 / 721            | 0.33                                   | Both significant in same direction |
| ICD for primary prevention of sudden cardiac death vs. no ICD | OS           | 3-5                   | HR            | 0.74 (0.63 to 0.86)                                   | >1000 / 19808       | 5D                    | HR            | 0.71 (0.54 to 0.92)                                   | NR / 17645          | 0.81                                   | Both significant in same direction |
| ICD for primary prevention of sudden cardiac death vs. no ICD | RCT          | 1                     | HR            | 0.48 (0.34 to 0.67)                                   | NR / NR             | 3b                    | HR            | 0.82 (0.66 to 1.01)                                   | NR / NR             | <b>0.0085</b>                          | <b>Less severe stage</b>           |
| Trans-catheter vs. surgical aortic valve replacement          | OS           | ND                    | OR            | 0.65 (0.41 to 1.03)                                   | 792 / 9619          | 5D                    | OR            | 0.78 (0.51 to 1.21)                                   | 642 / 8064          | 0.57                                   | Both not significant               |
| Warfarin for atrial fibrillation vs. control                  | OS           | ND                    | HR            | 0.66 (0.6 to 0.72)                                    | >1000 / 30333       | 5HD                   | OR            | 0.91 (0.8 to 1.03)                                    | 9088 / 19281        | <b>0.000056</b>                        | <b>Less severe stage</b>           |
| Cinacalcet vs. control                                        | RCT          | 3-5                   | RR            | 0.97 (0.89 to 1.05)                                   | NR / 8386           | 5D                    | RR            | 0.97 (0.89 to 1.05)                                   | NR / 8632           | 0.97                                   | Both not significant               |
| Statin vs. less statin or placebo                             | RCT          | ND                    | RR            | 0.78 (0.72 to 0.86)                                   | 2351 / 33589        | 5D                    | RR            | 0.98 (0.93 to 1.03)                                   | 2900 / 7051         | <b>0.000026</b>                        | <b>Less severe stage</b>           |
| Vitamin D vs. control                                         | RCT          | ND                    | RR            | 1.55 (0.52 to 4.62)                                   | NR / 832            | 5D                    | RR            | 1.13 (0.63 to 2.03)                                   | NR / 700            | 0.62                                   | Both not significant               |
| Vitamin D vs. control                                         | OS           | ND                    | RR            | 0.53 (0.32 to 0.87)                                   | NR / 2729           | 5D                    | RR            | 0.65 (0.57 to 0.75)                                   | >1000 / 218639      | 0.43                                   | Both significant in same direction |
| Fibrate vs. placebo                                           | RCT          | 1-2                   | RR            | 1.01 (0.8 to 1.27)                                    | 969 / 11408         | 3                     | RR            | 0.86 (0.63 to 1.19)                                   | 128 / 918           | 0.44                                   | Both not significant               |
| Folic acid supplement vs. placebo                             | RCT          | 3-5                   | RR            | 1.04 (0.93 to 1.16)                                   | 756 / 2215          | 5D                    | RR            | 1 (0.9 to 1.12)                                       | 819 / 2447          | 0.6                                    | Both not significant               |

a. Summary estimate smaller than 1 favors experimental arm (lower mortality in experimental arm); effect estimate larger than 1 favors control arm (lower mortality in control arm)

b. Significance threshold of Cochran's Q test for heterogeneity is p value < 0.1. Significant associations were shown in bold.

All statistical tests are two-sided.

Abbreviations: ACEI, angiotensin-converting enzyme inhibitor; acm, all-cause mortality; ARB, angiotensin receptor blocker; BMS, bare metal stent; CABG, coronary artery bypass; CI, confidence interval; CKD, chronic kidney disease; DES, drug-eluting stent; HR, hazard ratio; ICD, implantable cardioverter defibrillator; NR, not reported; OR, odds ratio; OS, observational study; PCI, percutaneous intervention; RCT, randomized controlled trial; RR, risk ratio; vs., versus

**Table S8. Sensitivity subset analysis of prospective studies only of evidence from observational studies graded as convincing or highly suggestive evidence**

| Author, year             | Comparison (experimental arm vs. control arm)                                                        | CKD stage | Number of studies | Effect metrics | Summary effect estimate (95% CI) under random effects <sup>a</sup> | Summary estimate p value | I <sup>2</sup> (%) | 95% prediction interval | Evaluation of bias <sup>b</sup>                                         | Change of level of evidence         |
|--------------------------|------------------------------------------------------------------------------------------------------|-----------|-------------------|----------------|--------------------------------------------------------------------|--------------------------|--------------------|-------------------------|-------------------------------------------------------------------------|-------------------------------------|
| Qin, et al. 2016         | ACEI or ARB vs. no ACEI or ARB                                                                       | ND        | 8                 | HR             | 0.83 (0.79 to 0.88)                                                | 7E-12                    | 48                 | 0.72 to 0.95            | None                                                                    | Convincing retained                 |
| Dahal, et al. 2016       | Warfarin for atrial fibrillation vs. no warfarin                                                     | ND        | 2                 | HR             | 0.69 (0.62 to 0.77)                                                | 1.6E-12                  | 0                  | NA                      | Loss of significance under 10% credibility ceiling                      | Convincing to highly suggestive     |
| Volodarskiy, et al. 2016 | CABG vs. PCI                                                                                         | 3-5       | 3                 | RR             | 1.15 (0.55 to 2.41)                                                | 0.7                      | 48                 | 0 to 1963.73            | None                                                                    | Highly suggestive to no association |
| Lu, et al. 2017          | Vitamin D or analogues vs. non-vitamin D treatment                                                   | 5D        | 10                | RR             | 0.56 (0.43 to 0.74)                                                | 0.000043                 | 93                 | 0.23 to 1.41            | Large heterogeneity; small study effects                                | Highly suggestive to suggestive     |
| Ravani, et al. 2013      | Catheter as HD access vs. fistula                                                                    | 5HD       | 8                 | RR             | 1.34 (1.26 to 1.42)                                                | 2.9E-23                  | 15                 | 1.2 to 1.49             | Small study effects                                                     | Highly suggestive retained          |
| Ravani, et al. 2013      | Catheter as HD access vs. graft                                                                      | 5HD       | 6                 | RR             | 1.59 (1.22 to 2.08)                                                | 0.00061                  | 90                 | 0.68 to 3.73            | Large heterogeneity                                                     | Highly suggestive to suggestive     |
| Jin, et al. 2013         | Prolonged nocturnal or daytime HD vs. conventional HD                                                | 5         | 6                 | OR             | 0.71 (0.6 to 0.85)                                                 | 0.00017                  | 71                 | 0.42 to 1.2             | Large heterogeneity; small study effects                                | Highly suggestive to suggestive     |
| Smart, et al. 2014       | Early referral to specialist nephrology services vs. late referral to specialist nephrology services | Any       | 4                 | RR             | 0.52 (0.29 to 0.94)                                                | 0.03                     | 57                 | 0.05 to 5.06            | Large heterogeneity; loss of significance under 10% credibility ceiling | Highly suggestive to weak           |

a. Summary estimate smaller than 1 favors experimental arm (lower mortality in experimental arm); effect estimate larger than 1 favors control arm (lower mortality in control arm)

b. Any of the following: large heterogeneity, signs of small study effects, signs of excess significance bias, and for observational studies, loss of statistical significance in 10% credibility ceiling.

All statistical tests are two-sided.

Abbreviations: ACEI, angiotensin-converting enzyme inhibitor; ARB, angiotensin receptor blocker; CABG, coronary artery bypass grafting; CI, confidence interval; CKD, chronic kidney disease; HD, hemodialysis; HR, hazard ratio; NR, not reported; OR, odds ratio; PCI, percutaneous intervention; RR, risk ratio; vs., versus

## Supplementary References

1. Amato L, Addis A, Saulle R, Trotta F, Mitrova Z, Davoli M. Comparative efficacy and safety in ESA biosimilars vs. originators in adults with chronic kidney disease: a systematic review and meta-analysis. *J Nephrol*. 2018;31(3):321-32.
2. Apetrii M, Goldsmith D, Nistor I, et al. Impact of surgical parathyroidectomy on chronic kidney disease-mineral and bone disorder (CKD-MBD) - A systematic review and meta-analysis. *PLoS ONE*. 2017;12(11):e0187025.
3. Badve SV, Roberts MA, Hawley CM, et al. Effects of beta-adrenergic antagonists in patients with chronic kidney disease: a systematic review and meta-analysis. *J Am Coll Cardiol*. 2011;58(11):1152-61.
4. Charytan DM, Desai M, Mathur M, et al. Reduced risk of myocardial infarct and revascularization following coronary artery bypass grafting compared with percutaneous coronary intervention in patients with chronic kidney disease. *Kidney Int*. 2016;90(2):411-21.
5. Cheng X, Hu Q, Zhao H, Qin S, Zhang D. Transcatheter Versus Surgical Aortic Valve Replacement in Patients With Chronic Kidney Disease: A Meta-Analysis. *J Cardiothorac Vasc Anesth*. 2018.
6. Crowley MJ, Diamantidis CJ, McDuffie JR, et al. Clinical Outcomes of Metformin Use in Populations With Chronic Kidney Disease, Congestive Heart Failure, or Chronic Liver Disease: A Systematic Review. *Ann Intern Med*. 2017;166(3):191-200.
7. Dahal K, Kunwar S, Rijal J, Schulman P, Lee J. Stroke, Major Bleeding, and Mortality Outcomes in Warfarin Users With Atrial Fibrillation and Chronic Kidney Disease: A Meta-Analysis of Observational Studies. *Chest*. 2016;149(4):951-9.
8. Das S, Dey JK, Sen S, Mukherjee R. Efficacy and Safety of Patiromer in Hyperkalemia: A Systematic Review and Meta-Analysis. *J Pharm Pract*. 2018;31(1):6-17.
9. Fu L, Zhou Q, Zhu W, et al. Do Implantable Cardioverter Defibrillators Reduce Mortality in Patients With Chronic Kidney Disease at All Stages? *Int Heart J*. 2017;58(3):371-7.
10. Greeviroj P, Kitrungphaiboon T, Katavetin P, et al. Cinacalcet for Treatment of Chronic Kidney Disease-Mineral and Bone Disorder: A Meta-Analysis of Randomized Controlled Trials. *Nephron*. 2018;139(3):197-210.
11. Habbous S, Przech S, Acedillo R, Sarma S, Garg AX, Martin J. The efficacy and safety of sevelamer and lanthanum versus calcium-containing and iron-based binders in treating hyperphosphatemia in patients with chronic kidney disease: a systematic review and meta-analysis. *Nephrol Dial Transplant*. 2017;32(1):111-25.
12. Hahn D, Esezobor CI, Elserafy N, Webster AC, Hodson EM. Short-acting erythropoiesis-stimulating agents for anaemia in predialysis patients. *Cochrane Database Syst Rev*. 2017;1:Cd0011690.
13. Hahn D, Hodson EM, Fouque D. Low protein diets for non-diabetic adults with chronic kidney disease. *Cochrane Database Syst Rev*. 2018;10:Cd001892.
14. Han SS, Park JY, Kang S, et al. Dialysis Modality and Mortality in the Elderly: A Meta-Analysis. *Clin J Am Soc Nephrol*. 2015;10(6):983-93.
15. He G, Li Q, Li W, Wang L, Yang J, Zeng F. N-Acetylcysteine for Preventing of Acute Kidney Injury in Chronic Kidney Disease Patients Undergoing Cardiac Surgery: A Metaanalysis. *Heart Surg Forum*. 2018;21(6):E513-e21.
16. He L, Li MS, Lin M, Zhao TY, Gao P. Effect of fish oil supplement in maintenance hemodialysis patients: a systematic review and meta-analysis of published randomized controlled trials. *Eur J Clin Pharmacol*. 2016;72(2):129-39.
17. Heerspink HJ, Ninomiya T, Zoungas S, et al. Effect of lowering blood pressure on cardiovascular events and mortality in patients on dialysis: a systematic review and meta-analysis of randomised controlled trials. *Lancet*. 2009;373(9668):1009-15.
18. Herrington WG, Emberson J, Mihaylova B, et al. Impact of renal function on the effects of LDL cholesterol lowering with statin-based regimens: a meta-analysis of individual participant data from 28 randomised trials. *Lancet Diabetes Endocrinol*. 2016;4(10):829-39.
19. Htay H, Johnson DW, Wiggins KJ, et al. Biocompatible dialysis fluids for peritoneal dialysis. *Cochrane Database Syst Rev*. 2018;10:Cd007554.
20. Jardine MJ, Kang A, Zoungas S, et al. The effect of folic acid based homocysteine lowering on cardiovascular events in people with kidney disease: systematic review and meta-analysis. *BMJ*. 2012;344:e3533.
21. Jin HM, Guo LL, Zhan XL, Pan Y. Effect of prolonged weekly hemodialysis on survival of maintenance hemodialysis patients: a meta-analysis of studies. *Nephron Clin Pract*. 2013;123(3-4):220-8.
22. Jun M, Venkataraman V, Razavian M, et al. Antioxidants for chronic kidney disease. *Cochrane Database Syst Rev*. 2012;10:Cd008176.
23. Jun M, Zhu B, Tonelli M, et al. Effects of fibrates in kidney disease: a systematic review and meta-analysis. *J Am Coll Cardiol*. 2012;60(20):2061-71.
24. Kannan A, Poongkunran C, Medina R, Ramanujam V, Poongkunran M, Balamuthusamy S. Coronary Revascularization in Chronic and End-Stage Renal Disease: A Systematic Review and Meta-analysis. *Am J Ther*. 2016;23(1):e16-28.
25. Kelly JT, Palmer SC, Wai SN, et al. Healthy Dietary Patterns and Risk of Mortality and ESRD in CKD: A Meta-Analysis of Cohort Studies. *Clin J Am Soc Nephrol*. 2017;12(2):272-9.
26. Khera S, Villablanca PA, Kolte D, et al. Long-Term Outcomes of Drug-Eluting Stents Versus Bare-Metal Stents in End-Stage Renal Disease Patients on Dialysis: A Systematic Review and Meta-Analysis. *Cardiol Rev*. 2018;26(6):277-86.
27. Koulouridis I, Alfayez M, Trikalinos TA, Balk EM, Jaber BL. Dose of erythropoiesis-stimulating agents and adverse outcomes in CKD: a metaregression analysis. *Am J Kidney Dis*. 2013;61(1):44-56.
28. Lei H, Yu LT, Wang WN, Zhang SG. Warfarin and the Risk of Death, Stroke, and Major Bleeding in Patients With Atrial Fibrillation Receiving Hemodialysis: A Systematic Review and Meta-Analysis. *Front Pharmacol*. 2018;9:1218.
29. Li C, Lv L, Wang H, et al. Total parathyroidectomy versus total parathyroidectomy with autotransplantation for secondary hyperparathyroidism: systematic review and meta-analysis. *Ren Fail*. 2017;39(1):678-87.
30. Li SM, He WB, Chen J, et al. Combined blockade of renin-angiotensin-aldosterone system reduced all-cause but not cardiovascular mortality in dialysis patients: A mediation analysis and systematic review. *Atherosclerosis*. 2018;269:35-41.
31. Liu Y, Ma X, Zheng J, Jia J, Yan T. Effects of angiotensin-converting enzyme inhibitors and angiotensin receptor blockers on cardiovascular events and residual renal function in dialysis patients: a meta-analysis of randomised controlled trials. *BMC Nephrol*. 2017;18(1):206.
32. Lo C, Toyama T, Wang Y, et al. Insulin and glucose-lowering agents for treating people with diabetes and chronic kidney disease. *Cochrane Database Syst Rev*. 2018(9).
33. Lu R, Tang F, Zhang Y, et al. Comparison of Drug-Eluting and Bare Metal Stents in Patients With Chronic Kidney Disease: An Updated Systematic Review and Meta-Analysis. *J Am Heart Assoc*. 2016;5(11).
34. Lu R, Zhang Y, Zhu X, et al. Effects of mineralocorticoid receptor antagonists on left ventricular mass in chronic kidney disease patients: a systematic review and meta-analysis. *Int Urol Nephrol*. 2016;48(9):1499-509.
35. Lu RJ, Zhu SM, Tang FL, et al. Effects of vitamin D or its analogues on the mortality of patients with chronic kidney disease: an updated systematic review and meta-analysis. *Eur J Clin Nutr*. 2017;71(6):683-93.
36. Major RW, Oozerally I, Dawson S, Riddleston H, Gray LJ, Brunskill NJ. Aspirin and cardiovascular primary prevention in non-endstage chronic kidney disease: A meta-analysis. *Atherosclerosis*. 2016;251:177-82.
37. Malhotra R, Nguyen HA, Benavente O, et al. Association Between More Intensive vs Less Intensive Blood Pressure Lowering and Risk of Mortality in Chronic Kidney Disease Stages 3 to 5: A Systematic Review and Meta-analysis. *JAMA Intern Med*. 2017;177(10):1498-505.
38. Mathew A, McLeggon JA, Mehta N, et al. Mortality and Hospitalizations in Intensive Dialysis: A Systematic Review and Meta-Analysis. *Can J Kidney Health Dis*. 2018;5:2054358117749531.
39. McCann M, Moore ZE. Interventions for preventing infectious complications in haemodialysis patients with central venous catheters. *Cochrane Database Syst Rev*. 2010(1):Cd006894.
40. Nigwekar SU, Kang A, Zoungas S, et al. Interventions for lowering plasma homocysteine levels in dialysis patients. *Cochrane Database Syst Rev*. 2016(5):Cd004683.
41. Nistor I, De Sutter J, Drechsler C, et al. Effect of renin-angiotensin-aldosterone system blockade in adults with diabetes mellitus and advanced chronic kidney disease not on dialysis: a systematic review and meta-analysis. *Nephrol Dial Transplant*. 2018;33(1):12-22.
42. Nistor I, Palmer SC, Craig JC, et al. Haemodiafiltration, haemofiltration and haemodialysis for end-stage kidney disease. *Cochrane Database Syst Rev*. 2015(5):Cd006258.
43. Palmer SC, Di Micco L, Razavian M, et al. Antiplatelet agents for chronic kidney disease. *Cochrane Database Syst Rev*. 2013(2):Cd008834.
44. Palmer SC, Maggo JK, Campbell KL, et al. Dietary interventions for adults with chronic kidney disease. *Cochrane Database Syst Rev*. 2017;4:Cd011998.
45. Palmer SC, Mavridis D, Navarese E, et al. Comparative efficacy and safety of blood pressure-lowering agents in adults with diabetes and kidney disease: a network meta-analysis. *Lancet*. 2015;385(9982):2047-56.
46. Palmer SC, Navaneethan SD, Craig JC, et al. Meta-analysis: erythropoiesis-stimulating agents in patients with chronic kidney disease. *Ann Intern Med*. 2010;153(1):23-33.
47. Palmer SC, Saglimbene V, Craig JC, Navaneethan SD, Strippoli GF. Darbepoetin for the anaemia of chronic kidney disease. *Cochrane Database Syst Rev*. 2014(3):Cd009297.
48. Palmer SC, Saglimbene V, Mavridis D, et al. Erythropoiesis-stimulating agents for anaemia in adults with chronic kidney disease: a network meta-analysis. *Cochrane Database Syst Rev*. 2014(12):Cd010590.
49. Peters SA, Bots ML, Canaud B, et al. Haemodiafiltration and mortality in end-stage kidney disease patients: a pooled individual participant data analysis from four randomized controlled trials. *Nephrol Dial Transplant*. 2016;31(6):978-84.
50. Phan K, Zhao DF, Zhou JJ, Karagaratnam A, Phan S, Yan TD. Bioprosthetic versus mechanical prostheses for valve replacement in end-stage renal disease patients: systematic review and meta-analysis. *J Thorac Dis*. 2016;8(5):769-77.
51. Pun PH, Al-Khatib SM, Han JY, et al. Implantable cardioverter-defibrillators for primary prevention of sudden cardiac death in CKD: a meta-analysis of patient-level data from 3 randomized trials. *Am J Kidney Dis*. 2014;64(1):32-9.

52. Qin Y, Chen T, Chen Q, et al. The effect of angiotensin-converting enzyme inhibitor/angiotensin receptor blocker use on mortality in patients with chronic kidney disease: a meta-analysis of observational studies. *Pharmacoepidemiol Drug Saf.* 2016;25(5):503-11.
53. Quach K, Lvtvyn L, Baigent C, et al. The Safety and Efficacy of Mineralocorticoid Receptor Antagonists in Patients Who Require Dialysis: A Systematic Review and Meta-analysis. *Am J Kidney Dis.* 2016;68(4):591-8.
54. Ravani P, Palmer SC, Oliver MJ, et al. Associations between hemodialysis access type and clinical outcomes: a systematic review. *J Am Soc Nephrol.* 2013;24(3):465-73.
55. Remschmidt C, Wichmann O, Harder T. Influenza vaccination in patients with end-stage renal disease: systematic review and assessment of quality of evidence related to vaccine efficacy, effectiveness, and safety. *BMC Med.* 2014;12:244.
56. Ren X, Liu W, Peng Y, et al. Percutaneous coronary intervention compared with coronary artery bypass graft in coronary artery disease patients with chronic kidney disease: a systematic review and meta-analysis. *Ren Fail.* 2014;36(8):1177-86.
57. Ruospo M, Palmer SC, Natale P, et al. Phosphate binders for preventing and treating chronic kidney disease-mineral and bone disorder (CKD-MBD). *Cochrane Database Syst Rev.* 2018;8:Cd006023.
58. Sampson AL, Singer RF, Walters GD. Uric acid lowering therapies for preventing or delaying the progression of chronic kidney disease. *Cochrane Database Syst Rev.* 2017;10:Cd009460.
59. Scotland G, Cruickshank M, Jacobsen E, et al. Multiple-frequency bioimpedance devices for fluid management in people with chronic kidney disease receiving dialysis: a systematic review and economic evaluation. *Health Technol Assess.* 2018;22(1):1-138.
60. Sekercioglu N, Thabane L, Diaz Martinez JP, et al. Comparative Effectiveness of Phosphate Binders in Patients with Chronic Kidney Disease: A Systematic Review and Network Meta-Analysis. *PLoS ONE.* 2016;11(6):e0156891.
61. Sharma P, Blackburn RC, Parke CL, McCullough K, Marks A, Black C. Angiotensin-converting enzyme inhibitors and angiotensin receptor blockers for adults with early (stage 1 to 3) non-diabetic chronic kidney disease. *Cochrane Database Syst Rev.* 2011(10):Cd007751.
62. Shaw C, Nitsch D, Lee J, Fogarty D, Sharpe CC. Impact of an Early Invasive Strategy versus Conservative Strategy for Unstable Angina and Non-ST Elevation Acute Coronary Syndrome in Patients with Chronic Kidney Disease: A Systematic Review. *PLoS ONE.* 2016;11(5):e0153478.
63. Shepshelovich D, Rozen-Zvi B, Avni T, Gafter U, Gafter-Gvili A. Intravenous Versus Oral Iron Supplementation for the Treatment of Anemia in CKD: An Updated Systematic Review and Meta-analysis. *Am J Kidney Dis.* 2016;68(5):677-90.
64. Shi Y, Xiong J, Chen Y, et al. The effectiveness of multidisciplinary care models for patients with chronic kidney disease: a systematic review and meta-analysis. *Int Urol Nephrol.* 2018;50(2):301-12.
65. Shurrab M, Ko DT, Zayed Y, et al. Outcomes of ICDs and CRTs in patients with chronic kidney disease: a meta-analysis of 21,000 patients. *J Interv Card Electrophysiol.* 2018;53(1):123-9.
66. Silver SA, Bell CM, Chertow GM, et al. Effectiveness of Quality Improvement Strategies for the Management of CKD: A Meta-Analysis. *Clin J Am Soc Nephrol.* 2017;12(10):1601-14.
67. Smart NA, Dieberg G, Ladhani M, Titus T. Early referral to specialist nephrology services for preventing the progression to end-stage kidney disease. *Cochrane Database Syst Rev.* 2014(6):Cd007333.
68. Song K, Jiang S, Shi Y, Shen H, Shi X, Jing D. Renal replacement therapy for prevention of contrast-induced acute kidney injury: a meta-analysis of randomized controlled trials. *Am J Nephrol.* 2010;32(5):497-504.
69. Sun L, Zou L, Chen M, Liu B. Meta-analysis of statin therapy in maintenance dialysis patients. *Ren Fail.* 2015;37(7):1149-56.
70. Tan W, Wang Q, Xin G, et al. Different hemodialysis methods for survival of patients with maintenance hemodialysis: A meta-analysis. *Int J Clin Exp Med.* 2018;11(5):4389-96.
71. Toyama T, Neuen BL, Jun M, et al. Effect of SGLT2 inhibitors on cardiovascular, renal and safety outcomes in patients with type 2 diabetes mellitus and chronic kidney disease: A systematic review and meta-analysis. *Diabetes Obes Metab.* 2019.
72. Valentijn PP, Pereira FA, Ruospo M, et al. Person-Centered Integrated Care for Chronic Kidney Disease: A Systematic Review and Meta-Analysis of Randomized Controlled Trials. *Clin J Am Soc Nephrol.* 2018;13(3):375-86.
73. Volodarskiy A, Kumar S, Amin S, Bangalore S. Optimal Treatment Strategies in Patients with Chronic Kidney Disease and Coronary Artery Disease. *Am J Med.* 2016;129(12):1288-98.
74. Volodarskiy A, Kumar S, Pracon R, et al. Drug-Eluting vs Bare-Metal Stents in Patients With Chronic Kidney Disease and Coronary Artery Disease: Insights From a Systematic Review and Meta-Analysis. *J Invasive Cardiol.* 2018;30(1):10-7.
75. Wali RK, Iyengar M, Beck GJ, et al. Efficacy and safety of carvedilol in treatment of heart failure with chronic kidney disease: a meta-analysis of randomized trials. *Circ Heart Fail.* 2011;4(1):18-26.
76. Wang AY, Ninomiya T, Al-Kahwa A, et al. Effect of hemodiafiltration or hemofiltration compared with hemodialysis on mortality and cardiovascular disease in chronic kidney failure: a systematic review and meta-analysis of randomized trials. *Am J Kidney Dis.* 2014;63(6):968-78.
77. Wang F, Lu X, Zhang J, Xiong R, Li H, Wang S. Effect of Lanthanum Carbonate on All-Cause Mortality in Patients Receiving Maintenance Hemodialysis: a Meta-Analysis of Randomized Controlled Trials. *Kidney Blood Press Res.* 2018;43(2):536-44.
78. Wang G, Liu H, Wang C, Ji X, Gu W, Mu Y. Cinacalcet versus Placebo for secondary hyperparathyroidism in chronic kidney disease patients: a meta-analysis of randomized controlled trials and trial sequential analysis. *Sci Rep.* 2018;8(1):3111.
79. Wang Y, Ivany JN, Perkovic V, Gallagher MP, Woodward M, Jardine MJ. Anticoagulants and antiplatelet agents for preventing central venous haemodialysis catheter malfunction in patients with end-stage kidney disease. *Cochrane Database Syst Rev.* 2016;4:Cd009631.
80. Wang Y, Zhu S, Gao P, Chen Y, Zhang Q. Drug-Eluting Stents Versus Bare-Metal Stents in Patients With End-Stage Renal Disease. *Am J Med Sci.* 2018;355(4):331-41.
81. Wang Y, Zhu S, Gao P, Zhou J, Zhang Q. Off-pump versus on-pump coronary surgery in patients with chronic kidney disease: a meta-analysis. *Clin Exp Nephrol.* 2018;22(1):99-109.
82. Wongrakpanich S, Susantitaphong P, Isaranuwatthai S, Chenbhanich J, Eiam-Ong S, Jaber BL. Dialysis Therapy and Conservative Management of Advanced Chronic Kidney Disease in the Elderly: A Systematic Review. *Nephron.* 2017;137(3):178-89.
83. Xie J, Kiryluk K, Ren H, et al. Coiled versus straight peritoneal dialysis catheters: a randomized controlled trial and meta-analysis. *Am J Kidney Dis.* 2011;58(6):946-55.
84. Xie X, Liu Y, Perkovic V, et al. Renin-Angiotensin System Inhibitors and Kidney and Cardiovascular Outcomes in Patients With CKD: A Bayesian Network Meta-analysis of Randomized Clinical Trials. *Am J Kidney Dis.* 2016;67(5):728-41.
85. Yang M, Xie XS, Yuan WJ. A meta-analysis of the effects of statin treatment on cardiovascular events and all-cause mortality in diabetic dialysis patients. *Int J Clin Exp Med.* 2015;8(6):8415-24.
86. Yang X, Liu Q, Yuan L, Wang H, Xie Q. Comparison of Limus-Eluting and Paclitaxel-Eluting Stents for Coronary Intervention in Patients with Chronic Kidney Disease. *Int Heart J.* 2018;59(6):1202-10.
87. Ye Y, Liu H, Chen Y, et al. Hemoglobin targets for the anemia in patients with dialysis-dependent chronic kidney disease: a meta-analysis of randomized, controlled trials. *Ren Fail.* 2018;40(1):671-9.
88. Zeng X, Lincoff AM, Schulz-Schupke S, et al. Efficacy and safety of bivalirudin in coronary artery disease patients with mild to moderate chronic kidney disease: Meta-analysis. *J Cardiol.* 2018;71(5):494-504.
89. Zhang X, Xiang C, Zhou YH, Jiang A, Qin YY, He J. Effect of statins on cardiovascular events in patients with mild to moderate chronic kidney disease: a systematic review and meta-analysis of randomized clinical trials. *BMC Cardiovasc Disord.* 2014;14:19.
90. Zhao HJ, Li Y, Liu SM, et al. Effect of calcium channels blockers and inhibitors of the renin-angiotensin system on renal outcomes and mortality in patients suffering from chronic kidney disease: systematic review and meta-analysis. *Ren Fail.* 2016;38(6):849-56.
91. Zhao Y, Pei X, Zhao W. Timing of Dialysis Initiation and Mortality Risk in Chronic Kidney Disease: A Meta-Analysis. *Ther Apher Dial.* 2018;22(6):600-8.
92. Zhou C, Gu Y, Mei C, Dai B, Wang Y, Xue C. Dialysis modality and mortality in polycystic kidney disease. *Hemodial Int.* 2018;22(4):515-23.
